1 **Title:** Advanced Hemodynamic and Cluster Analysis for Identifying Novel RV function  
2 subphenotypes in Patients with Pulmonary Hypertension.

3  
4  
5 **Authors:** Alexandra M Janowski<sup>1,2</sup>, Keeley S Ravellette<sup>3</sup>, Michael Insel<sup>4</sup>, Joe G Garcia<sup>5</sup>, Franz  
6 P Rischard<sup>4</sup>, and Rebecca R Vanderpool<sup>1,2</sup>

7  
8  
9 **Affiliations:** <sup>1</sup>Division of Cardiovascular Medicine, <sup>2</sup>Department of Biomedical Engineering,  
10 The Ohio State University, Columbus, OH; <sup>3</sup>Division of Translational and Regenerative  
11 Medicine, <sup>4</sup>Division of Pulmonary, Allergy, Critical Care and Sleep Medicine, The University of  
12 Arizona, Tucson, AZ, <sup>5</sup>Center for Inflammation Science and Systems Medicine, University of  
13 Florida

14  
15 **Running Title:** Novel RV subphenotypes in pulmonary hypertension

16  
17 Total Word Count: 4624

18  
19  
20  
21  
22 **Corresponding Author:**  
23 Rebecca R. Vanderpool, PhD.  
24 Assistant Professor,  
25 Division of Cardiovascular Medicine  
26 The Ohio State University  
27 Davis Heart and Lung Research Institute, Suite 610  
28 473 W. 12th Ave, Columbus, OH 43210  
29 Tel: (614) 685-0660  
30 Email: [Rebecca.Vanderpool@osumc.edu](mailto:Rebecca.Vanderpool@osumc.edu)

31  
32  
33

34 **Abstract**

35 **Background:** Quantifying right ventricular (RV) function is important to describe the  
36 pathophysiology of in pulmonary hypertension (PH). Current phenotyping strategies in PH rely  
37 on few invasive hemodynamic parameters to quantify RV dysfunction severity. The aim of this  
38 study was to identify novel RV phenotypes using unsupervised clustering methods on advanced  
39 hemodynamic features of RV function.

40 **Methods:** Participants were identified from the University of Arizona Pulmonary Hypertension  
41 Registry (n=190). RV-pulmonary artery coupling (Ees/Ea), RV systolic (Ees) and diastolic  
42 function (Eed) was quantified from stored RV pressure waveforms. Consensus clustering  
43 analysis with bootstrapping was used to identify the optimal clustering method. Pearson  
44 correlation analysis was used to reduce collinearity between variables. RV cluster subphenotypes  
45 were characterized using clinical data and compared to pulmonary vascular resistance (PVR)  
46 quintiles.

47 **Results:** Five distinct RV clusters (C1-C5) with distinct RV subphenotypes were identified using  
48 k-medoids with a Pearson distance matrix. Clusters 1 and 2 both have low diastolic stiffness  
49 (Eed) and afterload (Ea) but RV-PA coupling (Ees/Ea) is decreased in C2. Intermediate cluster  
50 (C3) has a similar Ees/Ea as C2 but with higher PA pressure and afterload. Clusters C4 and C5  
51 have increased Eed and Ea but C5 has a significant decrease in Ees/Ea. Cardiac output was high  
52 in C3 distinct from the other clusters. In the PVR quintiles, contractility increased and stroke  
53 volume decreased as a function of increased afterload. World Symposium PH classifications  
54 were distributed across clusters and PVR quintiles.

55 **Conclusions:** RV-centric phenotyping offers an opportunity for a more precise-medicine based  
56 management approach.

57

## 58 **Clinical Perspective**

### 59 What is new?

- 60 • Grouping participants based on pulmonary vascular resistance quintiles demonstrated an  
61 afterload-dependent increase in RV contractility and decrease in stroke volume with no  
62 change in RV-PA Coupling.
- 63 • Grouping participants using consensus clustering methods on advanced hemodynamic  
64 measures of RV function identified 5 unique clusters with distinct RV subphenotypes.
- 65 • Two RV cluster subphenotypes (C2 and C3) were identified with decreased RV  
66 contractility and RV-PA coupling when compared to participants in other clusters at a  
67 similar afterload.

### 68 What are the clinical implications?

- 69 • Unbiased clustering approaches can help identify afterload independent RV  
70 subphenotypes that require specific therapeutic approaches.

71

72

## 73 **Introduction**

74 Right ventricular (RV) function is a key determinant of mortality in pulmonary hypertension  
75 (PH).<sup>1</sup> However, current evaluations of RV function rely on singular measures of afterload,  
76 systolic or diastolic function in addition to clinical evaluations.<sup>2</sup> Maladaptation in the RV can be  
77 characterized by a combination of decreased contractility, decreased RV-pulmonary artery (PA)  
78 coupling, increased diastolic stiffness at a given RV afterload.<sup>3</sup> However, a single-variable  
79 approach may lead to missing phenotypic data reflective of unique functional states. In a  
80 heterogenous disease like PH, the interplay between multiple variables can affect phenotypes in a  
81 holistic manner.<sup>4</sup> When RV variables were added to current phenotyping strategies, phenotypes  
82 that reflect disease progression, patient prognosis, and highlight new potential therapeutic targets  
83 have been identified.<sup>5,6</sup> Further, investigating the role that advanced RV function variables play  
84 on sub-phenotyping patients with PH may shed light on mechanisms of RV dysfunction.  
85 Functional subphenotypes that cross World Symposium Pulmonary Hypertension (WSPH)  
86 groups could give us insight into shared mechanisms complementing our current clinical  
87 classification.  
88 Clustering analysis is an evolving tool that allows for the identification, classification, and  
89 evaluation of novel phenotypes from multiple data variables.<sup>5,7,8</sup> Cluster analysis has been  
90 applied to proteomics, hemodynamics, clinical data, imaging data, and molecular and genomic  
91 data to identify novel sub-groups<sup>7-11</sup> in patients with idiopathic pulmonary arterial hypertension  
92 (PAH)<sup>5,10</sup>, patients with exercise intolerance<sup>7</sup> or patients with systemic sclerosis<sup>11,12</sup>.  
93 Unsupervised clustering analysis provides an unbiased approach to holistically look at  
94 hemodynamic, RV function and clinical variables to develop phenotypes that reflect functional  
95 states of disease.<sup>13</sup> Cluster analysis is fast and may identify functional signatures that may be

96 missed by a human observer due to high-dimensional data.<sup>14,15</sup> Consensus clustering evaluates  
97 multiple clustering algorithms to determine the most stable and consistent methods that best fit  
98 the dataset used.<sup>8,16</sup>

99  
100 The aim of this study was to identify novel RV subphenotypes by applying unsupervised cluster  
101 analysis to advanced hemodynamic measures of RV function such as diastolic stiffness,  
102 contractility, and RV-PA coupling. We hypothesize that the unbiased clustering can help to  
103 provide context for advanced RV function variables in the development of RV dysfunction and  
104 the development of phenotyping strategies that are reflective of disease severity and  
105 complementary to our current forms of evaluation.

106

## 107 **Methods**

### 108 *Patient Selection*

109 Participants with right heart catheterization data in the University of Arizona Pulmonary  
110 Hypertension Registry were included in the analysis. Pulmonary hypertension (PH) was defined  
111 by a resting mean pulmonary arterial pressure greater than or equal to 25 mmHg in agreement  
112 with the 2015 ERS/ESC guidelines. Pulmonary arterial hypertension (PAH) was further defined  
113 by a pulmonary artery wedge pressure (PAWP) of 15 mmHg or less and pulmonary vascular  
114 resistance of 3WU or more.<sup>17</sup> Participants were also classified based on WSPH classifications  
115 (WSPH group 1-5 and no PH, **Figure 1**) by an expert PH physician (FPR).<sup>17</sup> Participants were  
116 excluded from analysis if they were missing RV pressure waveforms (n=23). Informed consent  
117 was obtained for the participants and was approved by the institutional review board at the  
118 University of Arizona. (IRB Protocol no. 1100000621).

119

120 *Invasive Assessment of Systolic and Diastolic Right Ventricle Function*

121 Right heart catheterizations were performed according to standard clinical guidelines.<sup>17</sup> Briefly, a  
122 pulmonary artery catheter was guided through the antecubital vein, into the right atrium, right  
123 ventricle, and pulmonary artery. Pulmonary arterial pressure (PAP), right atrial pressure (RAP),  
124 RV pressure, and pulmonary wedge pressure (PAWP) were recorded. Cardiac Output (CO) was  
125 primarily measured using thermodilution but if not available we relied on Fick cardiac output.  
126 Cardiac index was calculated as the ratio of cardiac output to body surface area (BSA). Stroke  
127 volume (SV) was calculated as cardiac output/(heart rate (HR)\*1000). The pulse pressure was  
128 calculated as the difference between the systolic pulmonary arterial pressure (PAP) and diastolic  
129 PAP. Pulmonary artery (PA) compliance was calculated as the ratio of SV to pulse pressure. The  
130 contractile index was calculated as max dP/dt / systolic PAP.

131 Advanced measures of right ventricular function were quantified from RV pressure  
132 waveforms using the single beat method.<sup>18-20</sup> Briefly, max isovolumic pressure (Pmax) was  
133 estimated from a sinusoidal curve was fit to the early isovolumic contraction and late isovolumic  
134 relaxation phase. End systolic elastance was calculated as the ratio of (max isovolumic pressure  
135 (Pmax) - RV systolic pressure (RVSP)) and SV.<sup>21</sup> Arterial elastance (Ea) was calculated as the  
136 ratio between RVSP and SV. The RV-PA coupling ratio, Ees/Ea, was calculated as (Pmax-  
137 RVSP)/RVSP. RV diastolic stiffness was calculated by fitting the diastolic portion of the RV  
138 pressure-volume curve with the equation  $P = \alpha(e^{\beta V} - 1)$ , where  $\alpha$  is a curve-fitting parameter and  $\beta$   
139 is the diastolic stiffness coefficient.<sup>18,19</sup> End diastolic elastance (Eed) is the slope at end-diastole  
140 or  $P = \alpha\beta(e^{\beta V})$ . The RHC-derived stroke volume, an assumed RV end-diastolic volume of 250 ml  
141 and an RV waveform derived end diastolic pressure (RVEDP) were used to calculate Eed<sup>19</sup>.

142

143 *Variable Selection and Unsupervised Consensus Clustering*

144 Right ventricular function variables were identified for inclusion in clustering analysis. Pearson  
145 correlation analysis was used to assess collinearity. Variables with an  $|r| < 0.7$  were not considered  
146 colinear and included in the analysis. For colinear variables ( $|r| \geq 0.7$ ), variables were grouped  
147 based on physiological meaning (systolic function, afterload, etc.) and a single representative  
148 variable was selected. Variables were then normalized to range between 0 and 1 prior to the  
149 consensus clustering.

150 Consensus clustering methods were used to group participants in an unbiased but  
151 rigorous approach (**Figure 1**). To identify optimal cluster stability, common unsupervised  
152 machine learning algorithms (agglomerative hierarchical, k-means, and k-medoids clustering)  
153 and distance matrices (Euclidean, Manhattan, Spearman, Pearson, Canberra) were evaluated.<sup>22,23</sup>  
154 Internal validation statistics were used to determine the ideal combination of clustering method  
155 and distance matrix based on the resampling stability results (**Supplemental Methods and**  
156 **Table 1-3**).<sup>24</sup> In the consensus clustering, each algorithm + distance combination was run on a  
157 random subsection of 95% of the cohort for each of the 1000 iterations.<sup>25</sup> To determine the  
158 optimal clustering method+distance matrix combination, internal validation statistics were  
159 analyzed to find a combination that minimized the distance within clusters, the ratio of within-  
160 cluster to between cluster distance, and the widest within-cluster gap but also maximized the  
161 distance between clusters, silhouette width, separation index and the Calinski and Harabasz  
162 index stable and distinct groupings within the cohort. The optimal number of clusters (k) was  
163 evaluated for k=3-5 using the within-cluster sum of squares or “elbow” method the consensus

164 matrix, consensus cumulative distribution functions (CDF), and cluster-consensus values  
165 (**Supplemental Figure 1**).

166 Principal component analysis (PCA) was used to reduce the dimensionality of the  
167 variable space and visualize cluster results. Additionally, a variable correlation plot was used to  
168 investigate the relationship between variables in the first two principal components. Distance  
169 from the origin represents the quality of the variable in each principal component and the  
170 directionality of the vector is reflective of the correlation between the variable and principal  
171 component. Correlated variables are grouped together (small angle between vectors) and  
172 negatively correlated variables are in opposite quadrants (angles closer to 180 between vectors).  
173 To explore RV cluster group assignment outside of clustering, a decision tree model was  
174 constructed using the clustering variables (**Supplemental Figures 2-3**).

175

### 176 *Statistical Analysis*

177 Data are presented as mean  $\pm$  standard deviation for continuous variables, and as number of  
178 participants (percentage) for categorical variables. Kruskal-Wallis and Dunn tests were used to  
179 determine significance between groups for continuous variables. Chi-squared tests were used for  
180 categorical variables. A p-value of less than 0.05 was considered significant.

181 To visualize cluster specific phenotypic patterns, heatmap profiling and variable-variable  
182 pairwise network analysis was performed on the RV Clusters. As a comparison, the cohort was  
183 also split by PVR quintiles to visualize afterload specific heatmap and network analysis patterns.  
184 In the heatmaps, the standardized z-score for each variable was plotted for each participant and  
185 participants were grouped based on cluster assignment or separately for PVR quintiles (R-  
186 package: ‘ComplexHeatmap’)<sup>26</sup>. The variable-variable relationships within each cluster or PVR



187 quintile group were investigated using pairwise network analysis. A sparse network of the top 20  
188 partial correlations were evaluated from a weighted partial correlation network (R-packages:  
189 ‘ppcor’<sup>27</sup> and ‘igraph’). Resulting networks were presented as a circle layout to highlight  
190 network variance between each cluster.

191 Survival analysis was performed using the time between RHC and death or follow-up  
192 (March 22, 2020). Univariable survival analysis was performed using Cox Proportional Hazards  
193 regression ( $p < 0.1$ ) and adjusted for age, sex, and BMI ( $p < 0.05$ ). Receiver Operator  
194 Characteristics (ROC) curves used to identify thresholds to be used in Kaplan Meier analyses.  
195 Differences in outcome between groups (RV function variables, clusters, and WSPH groups)  
196 were assessed using Kaplan Meier plots with pairwise Log-Rank test. The group with the  
197 greatest survival rate was assigned to be the reference group.

198

## 199 **Results**

### 200 *Study Population*

201 Overall, participants ( $n=190$ ) were older ( $60 \pm 14$  years), predominately female ( $n=129$ , 68%)  
202 with elevated mean pulmonary artery pressure ( $37 \pm 16$  mmHg) and pulmonary vascular  
203 resistance ( $5.1 \pm 3.9$  WU) (**Table 1**). Majority of the participants had PH ( $n=152$ , 81%) with  
204 elevated PVR ( $5.8 \pm 4$  WU) compared to participants without PH (PVR:  $2.0 \pm 1.0$  WU,  $p < 0.05$ ).  
205 The majority of participants with PH had WSPH group 1 ( $n=92$ ) followed by WSPH group 2  
206 ( $n=22$ ), WSPH group 3 ( $n=24$ ), WSPH group 4 ( $n=12$ ), WSPH group 5 ( $n=2$ ) (**Supplemental**  
207 **Table 4**).

208

### 209 *Consensus Clustering Results*

210 RV function variables that were included in the clustering analysis were Ees, Ea, Ees/Ea, Eed,  
211 Beta, RV EDP, Max dP/dt, Min dP/dt, and the contractile index. Variables with high collinearity  
212 ( $|r|>0.7$ ) with other variables were excluded (RV systolic pressure, PA compliance and stroke  
213 volume). Consensus clustering internal validation statistics showed that k-medoids in  
214 combination with the Pearson distance matrix outperformed K-means and hierarchical clustering  
215 with this selection of clustering variables and cohort. (**Supplemental Table 3**). The optimal  
216 cluster number of K=5 increased cluster stability and intra-cluster consensus index values  
217 compared to K=3 or K=4 (**Supplemental Figure 1**). The five k-medoids-derived clusters were  
218 distributed across the first two principal components in distinct groups with moderate overlap  
219 (**Figure 2B**). The first and second principal components (Dim 1 and Dim 2) captured 48.7% and  
220 23.7% of the cohort variance, respectively. All variables are contributing to cluster assignment in  
221 Dim1 and 2 (**Figure 2C**). From the variable correlation plot, diastolic variables (Ea, Eed,  
222 RVEDP,  $\beta$ ) were grouped together with positive correlation with Dim 1 and slight negative  
223 correlation with Dim 2 (**Figure 2C**). Systolic variables congregated in two groups where max  
224 dP/dt, Ees, contractile index and Ees/Ea correlate positively with Dim 1. Min dP/dt mainly  
225 contributed to cluster assignment in Dim 1 where Max dP/dt and Ees mainly contributed to  
226 cluster assignments in Dim 2.

227

### 228 *Characterizing RV function in identified Clusters*

229 Sex, BSA, and PAWP are heterogenous throughout all the clusters (**Table 1**). There were no  
230 significant differences in age between clusters except participants in Cluster C2 are significantly  
231 older than the other clusters (age =  $65\pm 11$  years,  $p=0.001$ ). Analysis of the clustering variables  
232 across clusters suggest the clusters can be grouped into RV subphenotypes with characteristics of

233 reduced RV function including decreased contractility and RV-PA coupling (**Figure 3 and**  
234 **Table 1**).

- 235 • **Cluster 1** (C1, n = 38): Pulmonary pressure ( $p < 0.05$  vs C3-C5) and afterload (PVR  
236  $2.9 \pm 1.3$  WU,  $p < 0.05$  vs C4-C5) are low compared to other clusters. Additionally, RV  
237 diastolic stiffness is low (Eed:  $0.4 \pm 0.3$  mmHg/ml,  $p < 0.05$  vs C4-C5) and systolic function  
238 is high (Ees/Ea:  $2.2 \pm 1.1$ ,  $p < 0.05$  vs C4-C5). Cardiac output (CO:  $6.3 \pm 1.4$  L/min,  $p < 0.05$   
239 vs C4-C5) and PA compliance (Ca:  $4.3 \pm 2.0$  ml/mmHg,  $p < 0.05$  vs C2-C5) are good.
- 240 • **Cluster 2** (C2, n = 65): Characterized by decreased RV contractility (Ees:  $0.4 \pm 0.2$   
241 mmHg/ml,  $p < 0.05$  vs C1, C4-C5) and RV-PA coupling ratio (Ees/Ea:  $0.84 \pm 0.45$ ,  $p <$   
242  $0.05$  vs C1 and C4) despite low pulmonary artery pressure ( $p < 0.05$  vs C3-C5), and low  
243 afterload (PVR  $2.9 \pm 1.5$  WU,  $p < 0.05$  vs C4-C5). RV diastolic function (Eed:  $0.4 \pm 0.3$   
244 mmHg/ml,  $p < 0.05$  vs C3-C5). Identifying participants with decreased RV function  
245 relative to the pulmonary afterload.
- 246 • **Cluster 3** (C3, n = 15): Pulmonary pressure is increased (mPAP:  $42 \pm 9$  mmHg,  $p < 0.05$  vs  
247 C1-2) but with a similar RV function profiles as Cluster 2. RV function is decreased with  
248 decreased RV contractility ( $p < 0.05$  vs C1, C4-C5) and RV-PA coupling ratio ( $p < 0.05$  vs  
249 C1 and C4). Stroke volume (SV:  $114 \pm 22$  ml,  $p < 0.05$  vs all other groups) and cardiac  
250 output (CO:  $7.9 \pm 1.4$  L/min,  $p < 0.05$  vs all other groups) are the highest relative to other  
251 clusters.
- 252 • **Cluster 4** (C4, n = 30): In combination with increased afterload (Ea:  $1.3 \pm 0.6$  mmHg/ml,  
253  $p < 0.05$  vs C1-C3), RV contractility (Ees:  $1.8 \pm 0.9$  mmHg/ml,  $p < 0.05$  vs all other groups)  
254 is increased compared to the other clusters. RV diastolic stiffness (Eed:  $0.8 \pm 0.4$ ,  $p < 0.05$

255 vs C1-C3) is also increased. These measures of RV function are suggestive of an adapted  
256 RV with preserved RV-PA coupling (Ees/Ea:  $1.4 \pm 0.64$ ,  $p < 0.05$  vs all other groups)..  
257 • **Cluster 5** (C5, n = 42): Decreased RV contractility (Ees:  $1.2 \pm 0.7$  mmHg/ml,  $p < 0.05$  vs  
258 C2-C4) and decreased RV-PA coupling (Ees/Ea:  $0.84 \pm 0.41$ ,  $p < 0.05$  vs C1 and C4)  
259 compared to Cluster 4 suggest decreased RV function. Further elevation in RV diastolic  
260 stiffness (Eed:  $1.2 \pm 0.6$  mmHg/ml,  $p < 0.05$  vs all other groups) is potentially suggestive of  
261 more RV failure.

262 Representative pressure-volume loops for the RV clusters (**Figure 3B**) demonstrate that Cluster  
263 2 and cluster 3 have decreased contractility and RV-PA coupling compared to the other clusters.  
264 The increased stroke volume despite decreased Ees and Ees/Ea is suggestive of a shift to the  
265 Frank Starling mechanism for maintaining cardiac output in cluster 3.

266

#### 267 *RV function subphenotypes in Pulmonary Vascular Resistance groups*

268 As a comparison, the cohort was split into PVR quintiles with cut points of 2.1 WU, 3.2 WU, 4.7  
269 WU, and 8.0 WU (**Figure 3A, Supplemental Table 5**). RV function in the PVR groups (R-Q1  
270 to R-Q5) is reflective of the increased afterload (**Figure 3A, right**). In R-Q1 (PVR:  $1.5 \pm 0.4$ , n =  
271 35), pulmonary pressure (mPAP:  $p < 0.05$  vs all other quintiles) and diastolic function (Eed:  
272  $1.1 \pm 0.5$  mmHg/ml,  $p < 0.05$  vs R-Q3, R-Q4, and R-Q5) are low. There were no significant  
273 differences in Ees/Ea between quintiles (Kruskal Wallis  $p = 0.43$ , **Supplemental Table 5**). In R-  
274 Q2 (PVR:  $2.5 \pm 0.3$  WU, n = 40), contractile index ( $p < 0.05$ ) and min dP/dt ( $p < 0.05$ ) are decreased  
275 with no other significant changes in RV function variables compared to R-Q1. Signs of RV  
276 dysfunction start to emerge in R-Q3 (PVR:  $4.0 \pm 0.5$ , n = 41) with increased Eed ( $0.6 \pm 0.4$ ,  $p < 0.05$   
277 vs R-Q1 and R-Q2) and decreased contractile index ( $8.7 \pm 3.4$   $p < 0.05$  vs R-Q1). RV diastolic

278 dysfunction is more pronounced in R-Q4 and R-Q5 quintiles with a further increase in Eed. As  
279 expected, PA compliance and stroke volume decreased in response to increased PVR. Ees  
280 increased for both R-Q4 and R-Q5 but with no change in Ees/Ea suggesting preserved RV-PA  
281 coupling. This is in contrast to the cluster groups that have more distinct RV function  
282 phenotypes and RV-PA coupling (**Figure 3A, left and Figure 3B, left**). Representative  
283 pressure-volume loops for the PVR quintiles (**Figure 3B**) demonstrate increased RV contractility  
284 (Ees), increased RV end-diastolic pressure and decreased stroke volume with the increase in  
285 afterload from R-Q1 to R-Q5. No significant changes in Ees/Ea between PVR quintiles.

286

### 287 *RV Clusters and WSPH classifications*

288 Grouping participants based on WSPH classifications does not lend itself to great phenotypic  
289 assessment of RV function (**Supplemental Table 4**). Participants with WSPH group 1 have  
290 increased PVR compared to WSPH groups 2-4 with similar measures of RV function between  
291 WSPH groups (**Supplemental Table 4**). WSPH group 3 had decreased RVSP, Pmax, and Ees  
292 compared to WSPH group 1 but no significant differences in Ees/Ea. There were no significant  
293 differences in RV diastolic stiffness between WSPH groups.

294 WSPH groups were distributed across the K-medoid clusters and PVR quintiles (**Figure**  
295 **2D and E**). There were significantly more participants with no PH in Clusters C1 and C2 ( $p =$   
296 0.0005). WSPH groups 1-4 were distributed across all clusters with the largest proportion of  
297 participants with WSPH group 1 in clusters C3–C4. When split by PVR quintiles, participants  
298 without PH were primarily in R-Q1 with decreasing numbers in other quintiles. Whereas, the  
299 percentage of participants with WSPH group 1 increases from R-Q1 to R-Q5. WSPH groups 2-4  
300 are distributed across the PVR quintiles.

301  
302 *Variable-Variable Interactions within Clusters and Quintiles*  
303 Variable-variable networks were developed to investigate the variable cross-talk in the clusters  
304 and PVR quintiles (**Figure 4**). In cluster 1, the prominent interactions were observed between  
305 hemodynamic and RV systolic variables, while interactions with RV diastolic variables were  
306 limited (**Figure 4, C1**). In contrast, cluster 2 (C2) had increased cross-talk between RV systolic  
307 and hemodynamic variables. For cluster 3 (C3), there were strong interactions between all  
308 hemodynamic, RV systolic and RV diastolic variables. Variable interactions in cluster 4 (C4)  
309 have a similar pattern as C2 but with more interactions within RV diastolic variables. In cluster 5  
310 (C5), there was an increased degree of cross-talk between hemodynamic and RV diastolic  
311 function variables but with minimal cross-talk hemodynamic and RV systolic function variables.  
312 Variable-variable interactions within the clusters do not necessarily suggest a continuum of  
313 afterload-induced RV dysfunction.

314       Alternatively, variable-variable interactions in the PVR quintile groups are more  
315 reflective of an afterload-dependent continuum (**Figure 4**). In the first two PVR quintiles (R-Q1  
316 and R-Q2, low afterload), interactions primarily occur within hemodynamic variables (PVR,  
317 mPAP and PAWP). While there are interactions observed between min dP/dt, RVSP and max  
318 dP/dt, the primary cross-talk is between Ea and pulmonary pressure. In R-Q3 (intermediate  
319 afterload), the cross-talk between variable types is lost. In both R-Q4 and R-Q5 (high afterload),  
320 there is increased cross-talk among variable types. Specifically, in R-Q4, the interactions  
321 between RV systolic and RV diastolic variables increases. In R-Q5, the variable-variable  
322 interaction between Ea and the hemodynamic variables reverts back to a pattern similar to that in

323 R-Q2. In comparison to the clusters, variable-to-variable interactions in the PVR quintiles exhibit  
324 more of a continuum with increased afterload.

325

### 326 *Predictors of Mortality*

327 There were 35 deaths during the follow-up period (median: 4.6 years, range 0.6 – 8.1 years). One  
328 and three-year survival was 90.5% and 67.4% respectively. As individual variables, Mean PA  
329 pressure, Pulse pressure, PA compliance, PVR, Ea and min dP/dt significantly associate with  
330 mortality after adjusting for age, sex and BMI (**Table 2**). Univariable Cox regression analysis  
331 showed that Ea (AUC: 0.681) and mPAP (AUC: 0.694) are better predictors of mortality  
332 compared to other hemodynamic and RV function variables (**Supplemental Figure 4**). In a  
333 multivariable model including mPAP, Ea, and adjusting for age, sex and BMI, mPAP was  
334 identified as an independent predictor of mortality. In the participants with PH (mPAP>25  
335 mmHg), Ea (AUC: 0.664) and mPAP (AUC: 0.688) remained as variables that associated with  
336 mortality with the highest AUC (**Supplemental Table 6**). In the PH specific multivariable model  
337 (mPAP and Ea adjusting for age, sex and BMI), mPAP was again an independent predictor of  
338 mortality. Participants with an Ea > 0.70 mmHg/ml or a mPAP > 41 mmHg have increased  
339 mortality (**Figure 5A and B**).

340 Pairwise log-rank testing showed no significant differences in prognosis between Clusters  
341 (**Figure 5C, p>0.05 all clusters**) or PVR quintiles (**Figure 5D, p>0.05 all quintiles**). As this is a  
342 retrospective analysis, treatment differences could present a significant bias survival analysis. On  
343 Cox regression analysis, cluster 4 (HR=4.24(3.70-4.78), p=0.008) had increased mortality  
344 compared to Cluster 2 (referent) when adjusted for age, sex, and BMI. Similarly, two PVR

345 quintiles (R-Q4 (HR=3.83(3.17-4.49), p=0.04) and R-Q5 (HR=3.76(3.09-4.42), p=0.047)) had  
346 increased mortality compared to R-Q1 (referent) when adjusted for age, sex, and BMI.

347

## 348 **Discussion**

349 We identified five distinct RV subphenotypes using unsupervised consensus clustering and  
350 hemodynamic measures of RV function including measures of RV-PA coupling (**Figure 3B**).  
351 The first two clusters are characterized as having low afterload and preserved (C1) or reduced  
352 RV systolic function (C2). Cluster 3 has decreased RV function with elevated pulmonary  
353 pressure, decreased contractility, decreased RV-PA coupling but with high CO. Clusters 4 and 5  
354 describe moderate (C4) and severe (C5) decrease in RV function with high afterload, increased  
355 RV diastolic stiffness, and decreased RV-PA coupling in cluster 5.

356 An NIH-NHLBI identified area of investigation is in understanding RV function across  
357 the spectrum of PVD clinical phenotypes.<sup>2</sup> One recommendation from the NHLBI led workshop  
358 was to apply systems biology and network medicine to endophenotype RV dysfunction in  
359 pulmonary vascular disease for the RV-specific treatment targets. Clustering methods have  
360 successfully been used to risk stratify patients with exercise intolerance<sup>7</sup>, identify immune  
361 phenotypes in PAH from proteomics<sup>8</sup>, and identify distinct phenotypes of IPAH<sup>5</sup>. However,  
362 clustering results are sensitive to collinearity between variables, randomness in the data, and the  
363 initial selection of the cluster centers. Components of pulmonary artery pressure are highly  
364 correlated<sup>28</sup> and many hemodynamic measures of RV function are calculated values. Pearson  
365 correlation analysis was used to focus on important features of RV function while reducing co-  
366 linearity between variables.<sup>7,13</sup> To account for inconsistencies and instabilities, we focused on  
367 consensus clustering methods that use validation statistics to identify clustering results that are



368 reproducible<sup>16,29</sup>. In our dataset, K-medoids with a Pearson distance matrix outperformed  
369 hierarchical and k-means clustering to provide the most stable and consistent clusters over  
370 multiple runs. Using this rigorous clustering workflow, we identified five clusters that reflect  
371 varying degrees of RV dysfunction.

372 Clustering approaches with an RV-centric focus is one of the first steps in better  
373 endophenotyping the clinical presentation of RV dysfunction. RV dysfunction is a complex  
374 pathophysiology and non-linear process that is difficult to capture with individual parameters.<sup>30</sup>  
375 Imaging parameters like RV ejection fraction<sup>31</sup>, end-systolic volume index<sup>32</sup> and the ratio of  
376 stroke volume to end-systolic volume<sup>20,33</sup> all significantly associate with mortality. Multi-beat  
377 conductance pressure-volume loop analysis is the gold standard for analyzing RV function and  
378 would be ideal for developing better RV endophenotypes.<sup>34,35</sup> However, clustering approaches  
379 rely on large datasets and conductance pressure-volume analysis is limited to specialized centers  
380 and smaller cohorts. Clinical single-beat pressure volume loop analysis using RHC derived  
381 stroke volume, we are able to estimate RV contractility, arterial afterload and RV-PA coupling in  
382 a relatively large cohort (n=190 participants).<sup>18,19,33</sup> By applying unbiased clustering approaches  
383 to the single-beat and hemodynamic measures of RV function, we identified 5 novel RV clusters  
384 that have varying degrees of afterload, contractility and RV-PA coupling.

385 When we took a more traditional approach and split the cohort based on increased  
386 afterload with the PVR quintiles, markers of RV dysfunction changed in an afterload dependent  
387 fashion (**Figure 3B, PVR quintiles**). Signs of dysfunction started to appear with a PVR > 3.2  
388 WU (R-Q3) with altered end-diastolic elastance, PA compliance and increased RV contractility  
389 (Supplemental Table 5). In contrast to the Clusters, there were no significant differences in  
390 Ees/Ea across the PVR quintiles. These findings could be important with the new ESC/ERS

391 definition of PH that includes a PVR cut-off of 2WU. The new PVR cut-off is based on the  
392 upper limit of normal for PVR and the lowest prognostically relevant threshold of PVR.<sup>36–38</sup>  
393 However, it is important we quantify RV function in participants with a PVR between 2-3 WU in  
394 the development of RV-centric models.

395 RV dysfunction is not limited to specific WSPH classifications. Right ventricular  
396 function can be disproportionately altered in subgroups of pulmonary hypertension due to  
397 underlying biology<sup>39</sup> Our data shows that WSPH groups were well distributed across the clusters  
398 and PVR quintiles (**Figure 2D and 2E**). The distribution is likely a result of WSPH  
399 classifications are based on etiology and clinical presentation rather than right ventricular  
400 function.<sup>40,41</sup> Right ventricular afterload is typically higher in patients with WSPH group 1 but  
401 there is still a broad spectrum of RV dysfunction across WSPH groups. Risk assessment has  
402 primarily focused on WSPH group 1 but RV dysfunction is a significant contributor to clinical  
403 worsening. It is expected that a comprehensive classification would naturally capture aspects of  
404 different phenotypes because of all of these variables are physiologically interdependent.  
405 However, recent RV imaging studies have highlighted the need for risk stratification methods to  
406 include specific measures of RV function in multi-domain risk profiling of patients with  
407 pulmonary arterial hypertension.<sup>32,42,43</sup> The addition of RV function/imaging to current risk  
408 assessments help to discriminate intermediate and high-risk profiles.<sup>32,43</sup>

409 Based on the analysis of variables, Cluster 3 presented several distinct and noteworthy  
410 features including reduced Ees/Ea despite a low PVR. The variable-variable network for Cluster  
411 3 showed increased interconnectivity between systolic, diastolic and hemodynamic variables that  
412 was seen in other clusters or the PVR quintiles. Another unique feature of the Cluster 3 is high  
413 cardiac output (Table 1) that could be due to a number of factors including accompanying health

414 conditions, prostacyclin therapy or obesity. The high cardiac output could be the results of  
415 portopulmonary hypertension, hyperthyroidism, anemia, chronic hypercapnia, liver disease, or  
416 congenital heart disease.<sup>44</sup> Cluster 3 did have the highest percentage of participants with high  
417 PAWP (>15 mmHg) (7/15 participants; 46.7%). However, only 1 participant in the cluster  
418 (6.7%) was classified as WSPH group 2 suggesting other factors are contributing to the elevated  
419 wedge pressure. One effect of prostacyclin therapy is increased cardiac output and 5/15  
420 participants in cluster 3 were on parenteral therapy. None of the participants in Cluster 3 had  
421 cirrhosis or portopulmonary hypertension and a high percentage (5/15) had connective tissue  
422 disease. Using BMI as a surrogate of obesity, cardiac output did not significantly associate with  
423 BMI (**Supplemental Figure 5**). A larger cohort is needed to identify if the increased cardiac  
424 output is a defining feature of C3 or just product of the cluster partitioning of the cohort.

425

#### 426 *Clinical Relevance*

427 Clustering participants allowed for the identification of novel RV phenotypes that consider  
428 systolic and diastolic RV function independent of WSPH classifications. The characteristics of  
429 RV function and the variable-variable interactions within the Clusters are different than those in  
430 the PVR quintiles. Additional work is needed to make better RV-centric risk stratification  
431 models as cluster 4 had an increased mortality risk (Table 3: HR: 4.24[3.70-4.78]) compared to  
432 cluster 2 but overall the Clusters did not associate with outcomes in a log rank test. Clinical  
433 application of these models is currently premature but these RV-centric clusters can help us  
434 better understand the hemodynamic presentation of RV dysfunction. The clustering variables that  
435 were used are all accessible from standard clinical tests without the need for specialized  
436 measurement equipment like conductance pressure-volume catheters<sup>45</sup> or CMR imaging.

437 Assessment of Pmax and Ees currently requires post processing of RV pressure waveforms that  
438 is not currently part of standard assessments.<sup>46</sup> However clinical assessment of systolic, diastolic  
439 and RV-PA coupling from standard RV pressure waveforms allows for a broader application of  
440 the findings.<sup>19</sup> In an exploration of decision tree models for predicting cluster assignment, the  
441 variables dP/dt, Ea, Eed and RVEDP were able to predict cluster assignment with 78% accuracy  
442 (**Supplemental Figure 3**). The search for the optimal collection of variables to inform  
443 therapeutic decisions is an ongoing endeavor to improve outcomes in patients with pulmonary  
444 hypertension.

445

#### 446 *Limitations*

447 The study includes a number of limitations The small size and single-institution cohort maybe  
448 have contributed to the lack of significance between cluster assignment and survival may be the  
449 result of a small single-institution cohort, treatment bias and/or survival bias.<sup>47</sup> Follow-up time  
450 was assessed as time between catheterization and death/last follow-up. This did not account for  
451 the time between diagnosis and index catheterization that is variable in prevalent patients. As a  
452 retrospective study without follow-up, it was not possible to evaluate differences in therapeutic  
453 responses on RV function. Inclusion of therapeutic changes on the clustering variables could  
454 provide additional phenotype characterization information in the development of RV  
455 subphenotypes. Cohort size limited some of the sub-group analysis specifically, WSPH group 5  
456 was excluded from subgroup analyses due to an n of 2. Cohort size also impacted the application  
457 of supervised models like decision trees due to limitations on the test/train datasets and increased  
458 overfitting of the models.<sup>48</sup> We reran the consensus clustering algorithms 1000 times with  
459 bootstrapping on each algorithm to improve validation and consistency. These methods should

460 be replicated on a larger validation cohort to investigate these unique aspects of the RV  
461 subphenotypes with particular focus on variable-variable interactions and unique cluster  
462 characteristics.

463

464

465 *Conclusion:*

466 This study demonstrates that the application of consensus clustering to hemodynamic  
467 measures of RV function may help identify better endophenotypes of RV function. Five distinct  
468 subphenotypes (clusters) were identified that differ substantially in contractility and RV-PA  
469 coupling (Ees/Ea) We detected a high-flow low-function phenotype that was absent when using  
470 other PH stratification criteria. Phenotype evaluation based on the RV function variables may  
471 help in identifying patient disease status and can provide future insights into RV endotypes and  
472 personalized treatment options that may better suit an individual's needs.

473

474 **Acknowledgements**

475 None.

476

477 **Sources of Funding**

478 Research reported in this article was supported by AHA Career Development Award  
479 (19CDA34730039) and the OSU Division of Cardiovascular Medicine.

480

481 **Disclosures**

482 None.

483 **REFERENCES**

- 484 1. Vonk-Noordegraaf, A. *et al.* Right heart adaptation to pulmonary arterial hypertension:  
485 Physiology and pathobiology. in *Journal of the American College of Cardiology* vol. 62  
486 D22–D33 (2013).
- 487 2. Leopold, J. A. *et al.* Diagnosis and Treatment of Right Heart Failure in Pulmonary Vascular  
488 Diseases: A National Heart, Lung, and Blood Institute Workshop. *Circulation: Heart Failure*  
489 **14**, e007975 (2021).
- 490 3. Ren, X., Johns, R. A. & Gao, W. D. Right heart in pulmonary hypertension: from adaptation  
491 to failure. *Pulmonary Circulation* **9**, 2045894019845611 (2019).
- 492 4. Leopold, J. A., Maron, B. A. & Loscalzo, J. The application of big data to cardiovascular  
493 disease: paths to precision medicine. *J Clin Invest* **130**, 29–38 (2020).
- 494 5. Badagliacca, R. *et al.* Clinical implications of idiopathic pulmonary arterial hypertension  
495 phenotypes defined by cluster analysis. *The Journal of Heart and Lung Transplantation* **39**,  
496 310–320 (2020).
- 497 6. Goh, Z. M. *et al.* Right ventricular remodelling in pulmonary arterial hypertension predicts  
498 treatment response. *Heart* (2022) doi:10.1136/heartjnl-2021-320733.
- 499 7. Oldham William M. *et al.* Network Analysis to Risk Stratify Patients With Exercise  
500 Intolerance. *Circulation Research* **122**, 864–876 (2018).
- 501 8. Sweatt Andrew J. *et al.* Discovery of Distinct Immune Phenotypes Using Machine Learning  
502 in Pulmonary Arterial Hypertension. *Circulation Research* **124**, 904–919 (2019).
- 503 9. Yuan, Y. *et al.* Deciphering the genetic and modular connections between coronary heart  
504 disease, idiopathic pulmonary arterial hypertension and pulmonary heart disease. *Molecular*  
505 *Medicine Reports* **14**, 661–670 (2016).

- 506 10. Parikh, K. S. *et al.* Novel approach to classifying patients with pulmonary arterial  
507 hypertension using cluster analysis. *Pulmonary Circulation* **7**, 486–493 (2017).
- 508 11. Launay, D. *et al.* Clinical phenotypes and survival of pre-capillary pulmonary hypertension  
509 in systemic sclerosis. *PLOS ONE* **13**, e0197112 (2018).
- 510 12. Knight, D. S. *et al.* Distinct cardiovascular phenotypes are associated with prognosis in  
511 systemic sclerosis: a cardiovascular magnetic resonance study. *European Heart Journal -*  
512 *Cardiovascular Imaging* jeac120 (2022) doi:10.1093/ehjci/jeac120.
- 513 13. Leha, A. *et al.* A machine learning approach for the prediction of pulmonary hypertension.  
514 *PLOS ONE* **14**, e0224453 (2019).
- 515 14. He, J. *et al.* The practical implementation of artificial intelligence technologies in medicine.  
516 *Nat Med* **25**, 30–36 (2019).
- 517 15. Ngiam, K. Y. & Khor, I. W. Big data and machine learning algorithms for health-care  
518 delivery. *The Lancet Oncology* **20**, e262–e273 (2019).
- 519 16. Monti, S., Tamayo, P., Mesirov, J. & Golub, T. Consensus Clustering: A Resampling-Based  
520 Method for Class Discovery and Visualization of Gene Expression Microarray Data.  
521 *Machine Learning* **52**, 91–118 (2003).
- 522 17. Galiè, N. *et al.* 2015 ESC/ERS Guidelines for the diagnosis and treatment of pulmonary  
523 hypertension: The Joint Task Force for the Diagnosis and Treatment of Pulmonary  
524 Hypertension of the European Society of Cardiology (ESC) and the European Respiratory  
525 Society (ERS) Endorsed by: Association for European Paediatric and Congenital Cardiology  
526 (AEPC), International Society for Heart and Lung Transplantation (ISHLT). *European*  
527 *Respiratory Journal* **46**, 903–975 (2015).

- 528 18. Trip, P. *et al.* Clinical relevance of right ventricular diastolic stiffness in pulmonary  
529 hypertension. *The European respiratory journal* **45**, 1603–12 (2015).
- 530 19. Vanderpool, R. R. *et al.* Surfing the Right Ventricular Pressure Waveform: Methods to  
531 assess Global, Systolic and Diastolic RV Function from a Clinical Right Heart  
532 Catheterization. *Pulm Circ* **10**, 2045894019850993 (2019).
- 533 20. Vanderpool, R. R. *et al.* RV-pulmonary arterial coupling predicts outcome in patients  
534 referred for pulmonary hypertension. *Heart (British Cardiac Society)* **101**, 37–43 (2015).
- 535 21. Singh, I., Oakland, H., Elassal, A. & Heerdt, P. M. Defining end-systolic pressure for single-  
536 beat estimation of right ventricle–pulmonary artery coupling: simple... but not really. *ERJ*  
537 *Open Research* **7**, (2021).
- 538 22. Arora, P., Deepali & Varshney, S. Analysis of K-Means and K-Medoids Algorithm For Big  
539 Data. *Procedia Computer Science* **78**, 507–512 (2016).
- 540 23. Chung, N. C. *et al.* Unsupervised Classification of Multi-Omics Data during Cardiac  
541 Remodeling using Deep Learning. *Methods* **166**, 66–73 (2019).
- 542 24. Akhanli, S. E. & Hennig, C. Comparing clusterings and numbers of clusters by aggregation  
543 of calibrated clustering validity indexes. *Stat Comput* **30**, 1523–1544 (2020).
- 544 25. Wilkerson, M. D. & Hayes, D. N. ConsensusClusterPlus: a class discovery tool with  
545 confidence assessments and item tracking. *Bioinformatics* **26**, 1572–1573 (2010).
- 546 26. Gu, Z., Eils, R. & Schlesner, M. Complex heatmaps reveal patterns and correlations in  
547 multidimensional genomic data. *Bioinformatics* **32**, 2847–2849 (2016).
- 548 27. Kim, S. ppcor: An R Package for a Fast Calculation to Semi-partial Correlation Coefficients.  
549 *Communications for Statistical Applications and Methods* **22**, 665–674 (2015).



- 550 28. Syed, R. *et al.* The Relationship Between the Components of Pulmonary Artery Pressure  
551 Remains Constant Under All Conditions in Both Health and Disease. *Chest* **133**, 633–639  
552 (2008).
- 553 29. Sarker, I. H. Machine Learning: Algorithms, Real-World Applications and Research  
554 Directions. *SN COMPUT. SCI.* **2**, 160 (2021).
- 555 30. Sanz, J., Sánchez-Quintana, D., Bossone, E., Bogaard, H. J. & Naeije, R. Anatomy,  
556 Function, and Dysfunction of the Right Ventricle: JACC State-of-the-Art Review. *J Am Coll*  
557 *Cardiol* **73**, 1463–1482 (2019).
- 558 31. van de Veerdonk, M. C. *et al.* Signs of Right Ventricular Deterioration in Clinically Stable  
559 Patients With Pulmonary Arterial Hypertension. *Chest* **147**, 1063–1071 (2015).
- 560 32. Lewis, R. A. *et al.* Identification of Cardiac Magnetic Resonance Imaging Thresholds for  
561 Risk Stratification in Pulmonary Arterial Hypertension. *Am J Respir Crit Care Med* **201**,  
562 458–468 (2020).
- 563 33. Trip, P. *et al.* Accurate assessment of load-independent right ventricular systolic function in  
564 patients with pulmonary hypertension. *The Journal of Heart and Lung Transplantation* **32**,  
565 50–55 (2013).
- 566 34. Hsu, S. *et al.* Multi-Beat Right Ventricular-Arterial Coupling Predicts Clinical Worsening in  
567 Pulmonary Arterial Hypertension. *J Am Heart Assoc* **9**, e016031 (2020).
- 568 35. Richter, M. J. *et al.* Evaluation and Prognostic Relevance of Right Ventricular-Arterial  
569 Coupling in Pulmonary Hypertension. *Am J Respir Crit Care Med* **201**, 116–119 (2020).
- 570 36. Kovacs, G., Berghold, A., Scheidl, S. & Olschewski, H. Pulmonary arterial pressure during  
571 rest and exercise in healthy subjects: a systematic review. *European Respiratory Journal* **34**,  
572 888–894 (2009).

- 573 37. Kovacs, G., Olschewski, A., Berghold, A. & Olschewski, H. Pulmonary vascular resistances  
574 during exercise in normal subjects: a systematic review. *European Respiratory Journal* **39**,  
575 319–328 (2012).
- 576 38. Maron, B. A. *et al.* Pulmonary vascular resistance and clinical outcomes in patients with  
577 pulmonary hypertension: a retrospective cohort study. *The Lancet Respiratory Medicine* **0**,  
578 (2020).
- 579 39. Todaro, M. C. *et al.* Echocardiographic evaluation of right ventricular-arterial coupling in  
580 pulmonary hypertension. *Am J Cardiovasc Dis* **10**, 272–283 (2020).
- 581 40. Simonneau, G. *et al.* Haemodynamic definitions and updated clinical classification of  
582 pulmonary hypertension. *European Respiratory Journal* **53**, 1801913 (2019).
- 583 41. Humbert, M. *et al.* 2022 ESC/ERS Guidelines for the diagnosis and treatment of pulmonary  
584 hypertension. *Eur Respir J* **61**, 2200879 (2023).
- 585 42. Alandejani, F. *et al.* Imaging and Risk Stratification in Pulmonary Arterial Hypertension:  
586 Time to Include Right Ventricular Assessment. *Frontiers in Cardiovascular Medicine* **9**,  
587 (2022).
- 588 43. Vicenzi, M. *et al.* The added value of right ventricular function normalized for afterload to  
589 improve risk stratification of patients with pulmonary arterial hypertension. *PLOS ONE* **17**,  
590 e0265059 (2022).
- 591 44. Mazzola, M., Madonna, R., Badagliacca, R. & Caterina, R. D. Porto-pulmonary arterial  
592 hypertension: Translation of pathophysiological concepts to the bedside. *Vascular*  
593 *Pharmacology* **145**, 107022 (2022).

- 594 45. Brener, M. I. *et al.* Invasive Right Ventricular Pressure-Volume Analysis: Basic Principles,  
595 Clinical Applications, and Practical Recommendations. *Circulation: Heart Failure* **15**,  
596 e009101 (2022).
- 597 46. Bachman, T. N., Bursic, J. J., Simon, M. A. & Champion, H. C. A Novel Acquisition  
598 Technique to Utilize Swan-Ganz Catheter data as a Surrogate for High-fidelity  
599 Micromanometry within the Right Ventricle and Pulmonary Circuit. *Cardiovascular*  
600 *Engineering and Technology* **4**, 183–191 (2013).
- 601 47. Pi, H. *et al.* Risk Prediction and Right Ventricular Dilation in a Single-Institution Pulmonary  
602 Arterial Hypertension Cohort. *Journal of the American Heart Association* **11**, e025521  
603 (2022).
- 604 48. Ying, X. An Overview of Overfitting and its Solutions. *J. Phys.: Conf. Ser.* **1168**, 022022  
605 (2019).
- 606  
607  
608

609 **Table Legends:**

610 **Table 1: Comparison of demographics, RV function, and hemodynamics across RV**

611 **function clusters.** BSA, body surface area; BMI, body mass index; RVSP, right ventricular  
612 systolic pressure; RVDP, right ventricular diastolic pressure; EDP, end diastolic pressure; PAP,  
613 pulmonary artery pressure; PA, pulmonary artery; PAWP, pulmonary artery wedge pressure;  
614 BDP, beginning diastolic pressure; Eed, end diastolic elastance; Ees, end systolic elastance; Ea,  
615 arterial elastance; PVR, pulmonary vascular resistance; P max, max isovolumic RV pressure. \*p  
616 < 0.05 vs Cluster C1 (“Mild”) , †p < 0.05 vs Cluster C2 (“Mild /Intermediate”) , #p < 0.05 vs  
617 Cluster C3 (“Intermediate”), ‡p < 0.05 vs Cluster C4 (“Moderate”)

618

619 **Table 2: Cox proportional hazards ratios for survival.** Univariate cox regression analysis and  
620 multivariate analysis when adjusted for age, sex, and BMI for significant variables across entire  
621 cohort showing the risk of death from the time of RHC to last date of follow-up. Multivariate  
622 models are composed of the significant univariate variables with the greatest AUC in ROC plots  
623 for hemodynamics or RV function. \* denotes significant variables

624

625 **Table 3: Cox proportional hazards ratios for survival in clusters and PVR quintiles.**

626 Univariate cox regression analysis for clusters and PVR quintiles and cox regression analysis  
627 when adjusted for age, sex, and BMI. Cluster C2 was used as a referent for the clusters, and PVR  
628 quintile R-Q1 was used as a referent for the PVR quintiles. \* denotes significant variables

629

630 **Figure Legends:**

631 **Figure. 1 Overview of the methods used in the development of RV function clusters.**

632 Participants were identified from the University of Arizona Pulmonary Hypertension Registry  
633 (N=190). The cohort included participants with PH based on World Symposium PH guidelines  
634 (N=153, WSPH) and participants without PH (n=36, mean PA pressure <25 mmHg). RV  
635 systolic, diastolic and pressure variables were obtained from right heart catheterization data.  
636 Correlation analysis was used to reduce collinearity ( $|r| > 0.7$ ) and identify variables used in the  
637 clustering analysis. Clinically meaningful variables that were highly correlated with many other  
638 variables ( $|r| \geq 0.7$ ) or only highly correlated with itself ( $|r| < 0.7$ ) were selected for use in  
639 clustering. Multiple unsupervised machine learning clustering methods and distance matrices  
640 were examined via consensus clustering algorithm using 95% subset of the cohort and repeated  
641 1000 times. The optimal unsupervised machine learning method and number of clusters (k) was  
642 applied to determine distinct RV function groups based on internal validation statistics, PCA  
643 confirmation of participant variance across clusters. Clinical clustering variables were used to  
644 develop descriptions of RV function within the identified clusters and PVR quintile groups.  
645 Survival analysis was applied to determine cluster and variable associations with outcomes.  
646 RHC, right heart catheterization; PCA, principal component analysis; WSPH, World Symposium  
647 Pulmonary Hypertension groups

648

649 **Figure 2: Development of RV clusters using Hemodynamic variables of RV function. A)**

650 Pearson correlation analysis identified variables with low collinearity ( $|r| < 0.7$ ) including:

651 Ees/Ea and the contractile index (red: positive correlations and blue: negative correlations).

652 Variables with high correlations ( $|r| > 0.7$ ) but are clinically meaningful were also considered in

653 the clustering analysis. The chosen variables are designated an \* by their labels. **B)** K-medoid  
654 cluster assignment (C1, C2, C3, C4 and C5) projected on the first two principal component  
655 analysis plot. The first two principal components (Dim 1 and Dim 2) account for 72.4% of the  
656 variance. Clusters are in distinct groups with some overlap between C2, C3, and C5. Each  
657 symbol represents a single participant. Colors and areas represent cluster assignment. **C)** Variable  
658 Correlation plot shows that all variables are contributing to cluster assignments in Dim 1 and 2.  
659 Diastolic function variables and the systolic function variables are grouped respectively. The  
660 majority of Min dP/dt contribution to cluster assignment is in Dim 1 where Contractile index and  
661 Ees/Ea mainly contributed in Dim 2. **(D and E)** World Symposium Pulmonary Hypertension  
662 (WSPH) groups distributed across RV function cluster **(D)** or PVR quintile **(E)**. Each bar shows  
663 number of participants from each WSPH group in each cluster (C1 to C5) and PVR quintile (R-  
664 Q1 to R-Q5). is representative of the percentage of participants in each WSPH group. WSPH  
665 groups are well distributed across both clusters and PVR quintiles, suggesting that WSPH does  
666 not reflect cluster assignment or degree of afterload on the right ventricle. **Abbreviations:** Ea,  
667 arterial elastance; PVR, pulmonary vascular resistance; mPAP, mean pulmonary arterial pressure;  
668 PP, pulse pressure; Pmax, max isovolumetric RV pressure; Ees, end systolic elastance; Eed, end  
669 diastolic elastance; EDP, end diastolic pressure; PCWP, pulmonary capillary wedge pressure;  
670 BDP, beginning diastolic pressure; Ees/Ea, RV-PA coupling ratio; CO, cardiac output; SV, stroke  
671 volume; Ca, pulmonary artery compliance.

672

673 **Figure 3: Representation of RV function profiles determined through clustering and by**  
674 **pulmonary vascular resistance. (A)** Heatmap of RV function, demographic, and hemodynamic  
675 variables (rows) in relation to individual participants grouped by k-medoids cluster (C1-C5) or

676 PVR quintile (R-Q1 – R-Q5). Z-score represents each value as whether it is greater than or less  
677 than the overall cohort average. Each cluster is reflective of a distinct functional phenotype. The  
678 clusters have more nuance in function than the PVR quintiles, which primarily reflects functional  
679 extremes. C3 uniquely has high CO that is not reflected in the other clusters/quintiles. **(B)**  
680 Representative pressure-volume loops for each cluster (left) and PVR quintile (right) based on  
681 the mean values for stroke volume, RV end-diastolic pressure, RV systolic pressure and Pmax.  
682 The pressure-volume loops in the RV clusters demonstrate the clusters 2, 5 and 3 have decreased  
683 contractility and RV-PA coupling (Ees/Ea) compared to cluster C1 and C4. Cluster 3 has an  
684 increase in stroke volume compared to all other clusters. Pressure-volume loop analysis for the  
685 PVR quintiles demonstrate that RV contractility (Ees) and RV end-diastolic pressure increase  
686 with increased afterload (Ea). There was a decrease in stroke volume going from R-Q1 to R-Q5.  
687 There were no significant changes in RV-PA coupling (Ees/Ea) in the PVR quintiles.  
688 Abbreviations: BSA, body surface area; BMI, body mass index; RVDP, RV diastolic pressure;  
689 HR, heart rate; RVSP, RV systolic pressure; RVEDP, RV end diastolic pressure; PAP,  
690 pulmonary artery pressure; PVR, pulmonary vascular resistance; Pmax, max isovolumic RV  
691 pressure; Ea, arterial elastance; Eed, end diastolic elastance; Ees, end systolic elastance; Ees/Ea,  
692 RV-PA coupling ratio; PAWP, pulmonary artery wedge pressure; CO, cardiac output; SV, stroke  
693 volume; Ca, PA compliance

694

695 **Figure 4: Network analysis to investigate variable-variable interactions in the Cluster and**  
696 **PVR quintile groups.** Comparison of variable-variable interactions within the Cluster groups  
697 (C1 to C5) and PVR quintiles (R-Q1 to R-Q5). Edge pattern reflects whether the partial  
698 correlation is positive or negative (solid = positive, dashed = negative). Edge weight is

699 proportional to the partial correlation values for each variable-variable pair. The interactions  
700 within Hemodynamics, RV systolic and RV diastolic variables change depending on the Cluster  
701 and PVR quintile group. In cluster 1 (C1), the variable-variable interactions are primarily within  
702 the Hemodynamics or within the RV systolic variables with little cross-talk. Cross-talk between  
703 variable groups increases in cluster 2 (C2) with a further increase in Cluster 3 (C3). The  
704 interactions in cluster 4 (C4) are more similar to cluster 2 where the interaction in cluster 5 (C5)  
705 are more similar to Cluster 1. The variable-variable interaction in the PVR quintiles follow more  
706 of an afterload-dependent change. In the first PVR quintile (R-Q1), the variable-variable  
707 interactions are primarily within the Hemodynamics or within the RV systolic variables. These  
708 interactions intensify in the second PVR quintile (R-Q2). The interaction pattern changes in R-  
709 Q3 with more isolated interactions within hemodynamic and RV systolic variables. The cross-  
710 talk between the RV systolic and RV diastolic variables increases in R-Q4. In R-Q5, the  
711 variable-variable interactions are primarily within the hemodynamics variables with cross talk to  
712 Ea.

713

714

715 **Figure 5: Association of Clusters and PVR quintiles with mortality.** All-cause mortality  
716 survival analysis across RV function clusters **(A)** RV function variable Ea was significantly  
717 associated with survival over time. **(B)** Hemodynamic variable mPAP was significantly  
718 associated with survival over time. Kaplan Meier curves show no association with survival over  
719 time to follow-up for k-medoids derived RV function clusters (C1, C3, C4, C5 vs C2) and **(D)**  
720 PVR quintiles are significantly associated with survival over time (R-Q2, R-Q3, R-Q4, R-Q5 vs  
721 R-Q1). Log-rank test was used to determine significant differences across groups in Kaplan  
722 Meier.



723 **Tables:**

724 **Table 1: Comparison of demographics, RV function, and hemodynamics across RV**  
 725 **function clusters.** BSA, body surface area; BMI, body mass index; RVSP, right ventricular  
 726 systolic pressure; RVDP, right ventricular diastolic pressure; EDP, end diastolic pressure; PAP,  
 727 pulmonary artery pressure; PA, pulmonary artery; PAWP, pulmonary artery wedge pressure;  
 728 BDP, beginning diastolic pressure; Eed, end diastolic elastance; Ees, end systolic elastance; Ea,  
 729 arterial elastance; PVR, pulmonary vascular resistance; P max, max isovolumic RV pressure.  
 730

|                                       | <b>Total<br/>(N=190)</b> | <b>C1<br/>(N=38)</b> | <b>C2<br/>(N=65)</b>     | <b>C3<br/>(N=15)</b>     | <b>C4<br/>(N=30)</b>      | <b>C5<br/>(N=52)</b>        |
|---------------------------------------|--------------------------|----------------------|--------------------------|--------------------------|---------------------------|-----------------------------|
| Age (years)                           | 60 ± 14                  | 59 ± 14              | 65 ± 11 <sup>*</sup>     | 57 ± 16 <sup>†</sup>     | 54 ± 15 <sup>*†</sup>     | 57 ± 14 <sup>†</sup>        |
| Sex (%)                               |                          |                      |                          |                          |                           |                             |
| Female                                | 129 (68%)                | 27 (71%)             | 47 (72%)                 | 7 (47%)                  | 23 (77%)                  | 25 (60%)                    |
| Male                                  | 61 (32%)                 | 11 (29%)             | 18 (28%)                 | 8 (53%)                  | 7 (23%)                   | 17 (41%)                    |
| Ethnicity (%)                         |                          |                      |                          |                          |                           |                             |
| Non-Hispanic                          | 158 (83%)                | 36 (95%)             | 58 (89%)                 | 12 (80%)                 | 21 (70%)                  | 31 (74%)                    |
| Hispanic                              | 32 (17%)                 | 2 (5%)               | 7 (11%)                  | 3 (20%)                  | 9 (30%)                   | 11 (26%)                    |
| Height (m)                            | 1.67 ± 0.11              | 1.67 ± 0.13          | 1.67 ± 0.09              | 1.72 ± 0.15 <sup>†</sup> | 1.65 ± 0.10 <sup>#</sup>  | 1.67 ± 0.10                 |
| Weight (kg)                           | 84 ± 25                  | 81 ± 22              | 85 ± 27                  | 89 ± 22                  | 84 ± 28                   | 83 ± 22                     |
| BSA (m <sup>2</sup> )                 | 1.91 ± 0.28              | 1.89 ± 0.29          | 1.91 ± 0.27              | 2.00 ± 0.28              | 1.91 ± 0.31               | 1.91 ± 0.25                 |
| BMI (kg/m <sup>2</sup> )              | 30 ± 8                   | 29 ± 7               | 30 ± 9                   | 30 ± 8                   | 30 ± 8                    | 30 ± 8                      |
| <b>Hemodynamics</b>                   |                          |                      |                          |                          |                           |                             |
| Heart rate (bpm)                      | 77 ± 13                  | 76 ± 14              | 75 ± 12                  | 71 ± 11                  | 77 ± 12                   | 81 ± 15 <sup>*†#</sup>      |
| Systolic PAP (mmHg)                   | 56 ± 25                  | 40 ± 13              | 38 ± 12                  | 67 ± 16 <sup>*†</sup>    | 84 ± 22 <sup>*†</sup>     | 76 ± 16 <sup>*†</sup>       |
| Diastolic PAP (mmHg)                  | 25 ± 11                  | 18 ± 7               | 17 ± 6                   | 29 ± 7 <sup>*†</sup>     | 34 ± 12 <sup>*†</sup>     | 33 ± 10 <sup>*†</sup>       |
| Mean PAP (mmHg)                       | 37 ± 16                  | 27 ± 8               | 25 ± 8                   | 42 ± 9 <sup>*†</sup>     | 53 ± 15 <sup>*†</sup>     | 49 ± 12 <sup>*†</sup>       |
| PAWP (mmHg)                           | 11 ± 6                   | 9 ± 4                | 9 ± 4                    | 14 ± 7 <sup>*†</sup>     | 13 ± 7 <sup>*†</sup>      | 12 ± 6 <sup>*†</sup>        |
| Cardiac output (L/min)                | 5.7 ± 1.7                | 6.3 ± 1.4            | 5.8 ± 1.7 <sup>*</sup>   | 7.9 ± 1.4 <sup>*†</sup>  | 5.4 ± 1.3 <sup>*#</sup>   | 4.3 ± 1.0 <sup>*†#‡</sup>   |
| Cardiac Index (L/min/m <sup>2</sup> ) | 2.98 ± 0.80              | 3.33 ± 0.65          | 3.04 ± 0.67 <sup>*</sup> | 4.05 ± 0.95 <sup>†</sup> | 2.84 ± 0.57 <sup>*#</sup> | 2.29 ± 0.57 <sup>*†#‡</sup> |
| <b>Vascular Stiffness</b>             |                          |                      |                          |                          |                           |                             |
| Pulse pressure (mmHg)                 | 32 ± 16                  | 22 ± 9               | 21 ± 8                   | 38 ± 12 <sup>*†</sup>    | 49 ± 14 <sup>*†</sup>     | 42 ± 12 <sup>*†</sup>       |
| PA compliance (ml/mmHg)               | 3.2 ± 2.0                | 4.3 ± 2.0            | 4.3 ± 2.0                | 3.3 ± 1.3                | 1.6 ± 0.7 <sup>*†#</sup>  | 1.4 ± 0.5 <sup>*†#</sup>    |
| Stroke volume (ml)                    | 76 ± 26                  | 84 ± 22              | 78 ± 23                  | 114 ± 22 <sup>*†</sup>   | 72 ± 22 <sup>*#</sup>     | 55 ± 13 <sup>*†#‡</sup>     |
| <b>Afterload</b>                      |                          |                      |                          |                          |                           |                             |
| PVR (WU)                              | 5.1 ± 3.9                | 2.9 ± 1.3            | 2.9 ± 1.5                | 3.8 ± 1.1                | 7.9 ± 4.2 <sup>*†#</sup>  | 8.7 ± 3.5 <sup>*†#</sup>    |
| Ea (mmHg/ml)                          | 0.9 ± 0.6                | 0.5 ± 0.2            | 0.5 ± 0.2                | 0.6 ± 0.2                | 1.3 ± 0.6 <sup>*†#</sup>  | 1.5 ± 0.6 <sup>*†#</sup>    |
| <b>Systolic Function</b>              |                          |                      |                          |                          |                           |                             |
| RVSP (mmHg)                           | 57 ± 25                  | 42 ± 11              | 38 ± 12                  | 69 ± 18 <sup>*†</sup>    | 86 ± 22 <sup>*†</sup>     | 77 ± 17 <sup>*†</sup>       |
| P max (mmHg)                          | 121 ± 60                 | 129 ± 49             | 68 ± 20 <sup>*</sup>     | 114 ± 31 <sup>†</sup>    | 201 ± 58 <sup>*†#</sup>   | 140 ± 37 <sup>†‡</sup>      |

|                   |           |            |               |               |                |                |
|-------------------|-----------|------------|---------------|---------------|----------------|----------------|
| Max dP/dt         | 488 ± 260 | 534 ± 183  | 275 ± 73 *    | 495 ± 117 †   | 870 ± 304 *†#  | 502 ± 144 †‡   |
| Contractile index | 9.3 ± 4.2 | 14.2 ± 4.8 | 7.9 ± 2.9 *   | 7.8 ± 2.7 *   | 10.6 ± 3.5 *†# | 6.7 ± 1.5 *†‡  |
| Ees (mmHg/ml)     | 0.9 ± 0.8 | 1.1 ± 0.7  | 0.4 ± 0.2 *   | 0.4 ± 0.2 *   | 1.8 ± 0.9 *†#  | 1.2 ± 0.7 †‡   |
| Ees/Ea            | 1.2 ± 0.8 | 2.2 ± 1.1  | 0.84 ± 0.45 * | 0.66 ± 0.31 * | 1.4 ± 0.64 *†# | 0.84 ± 0.41 *‡ |

#### Diastolic Function

|               |             |             |             |              |                 |                  |
|---------------|-------------|-------------|-------------|--------------|-----------------|------------------|
| RV EDP (mmHg) | 17 ± 8      | 12 ± 4      | 12 ± 4      | 25 ± 5*†     | 21 ± 6*†        | 24 ± 8*†         |
| Min dP/dt     | -498 ± 249  | -426 ± 135  | -285 ± 92 * | -513 ± 122 † | -864 ± 234 *†#  | -623 ± 145 *†‡   |
| RV beta       | 0.04 ± 0.02 | 0.03 ± 0.01 | 0.03 ± 0.01 | 0.03 ± 0.01  | 0.04 ± 0.01 *†# | 0.06 ± 0.01 *†#‡ |
| Eed (mmHg/ml) | 0.6 ± 0.5   | 0.4 ± 0.3   | 0.3 ± 0.2   | 0.5 ± 0.3 †  | 0.8 ± 0.4 *†#   | 1.2 ± 0.6 *†#‡   |

731  
 732 \*p < 0.05 vs Cluster C1 (“Mild”), †p < 0.05 vs Cluster C2 (“Mild /Intermediate”), #p < 0.05 vs  
 733 Cluster C3 (“Intermediate”), ‡p < 0.05 vs Cluster C4 (“Moderate”)

734 **Table 2: Cox proportional hazards ratios for survival.** Univariate cox regression analysis and  
 735 multivariate analysis when adjusted for age, sex, and BMI for significant variables across entire  
 736 cohort showing the risk of death from the time of RHC to last date of follow-up. Multivariate  
 737 models are composed of the significant univariate variables with the greatest AUC in ROC plots  
 738 for hemodynamics or RV function.

739  
 740

|                                        | Unadjusted Univariable (p<0.1) |         | Adjusted for age+sex+BMI Univariate (p<0.05) |         | Multivariable (p<0.05) |         |
|----------------------------------------|--------------------------------|---------|----------------------------------------------|---------|------------------------|---------|
|                                        | 95% CI for HR                  | P-value | 95% CI for HR                                | p-value | 95% CI for HR          | P-value |
| <b>Hemodynamics</b>                    |                                |         |                                              |         |                        |         |
| Mean PAP Cardiac Output Pulse Pressure | 1.03 (1.01-1.05)               | 0.002*  | 1.04 (1.03-1.05)                             | 0.0004* | 1.05 (1.02-1.09)       | 0.004*  |
| Ca                                     | 0.69 (0.54-0.89)               | 0.003*  | 0.68 (0.54-0.81)                             | 0.003*  | --                     | --      |
| PVR                                    | 1.083 (1.01-1.16)              | 0.02*   | 1.13 (1.09-1.17)                             | 0.003*  | --                     | --      |
| <b>RV Function</b>                     |                                |         |                                              |         |                        |         |
| Ea                                     | 1.58 (1.02-2.45)               | 0.04*   | 1.78 (1.54-2.01)                             | 0.02*   | 0.67 (0.27-1.7)        | 0.4     |
| Max dP/dt Contractile Index            | 1.001 (1.00-1.00)              | 0.07*   | 1.00 (1.00-1.00)                             | 0.05    | --                     | --      |
| Ees                                    | 1.22 (0.83-1.79)               | 0.3     | 1.29 (0.87-1.92)                             | 0.2     | --                     | --      |
| Ees/Ea                                 | 0.99 (0.67-1.47)               | 0.97    | 1.00 (0.68-1.48)                             | 1.0     | --                     | --      |
| RVEDP                                  | 1.03 (0.99-1.07)               | 0.1     | 1.04 (0.99-1.08)                             | 0.09    | --                     | --      |
| Min dP/dt                              | 0.999 (0.998-1.00)             | 0.03*   | 0.998 (0.998-0.999)                          | 0.0098* | --                     | --      |
| Log(Beta)                              | 1.674 (0.76-3.69)              | 0.2     | 1.69 (0.77-3.71)                             | 0.2     | --                     | --      |
| Eed                                    | 1.2 (0.68-2.12)                | 0.5     | 1.11 (0.64-1.92)                             | 0.7     | --                     | --      |

741 \* denotes significant variables  
 742

743 **Table 3: Cox proportional hazards ratios for survival in clusters and PVR quintiles.**  
 744 Univariate cox regression analysis for clusters and PVR quintiles and cox regression analysis  
 745 when adjusted for age, sex, and BMI. Cluster C2 was used as a referent for the clusters, and PVR  
 746 quintile R-Q1 was used as a referent for the PVR quintiles.

| Clusters             | PVR (WU)        | Unadjusted ( $p < 0.1$ ) |         | Adjusted for age+sex+BMI ( $p < 0.05$ ) |         |
|----------------------|-----------------|--------------------------|---------|-----------------------------------------|---------|
|                      |                 | 95% CI for HR            | p-value | 95% CI for HR                           | p-value |
| C2 (referent)        | 2.9 ± 1.5       | 1.0                      | -       | 1.0                                     | -       |
| C1                   | 2.9 ± 1.5       | 2.15 (1.59-2.70)         | 0.17    | 2.37 (1.81-2.93)                        | 0.12    |
| C3                   | 3.8 ± 1.1       | 2.23 (1.53-2.94)         | 0.26    | 2.20 (1.47-2.92)                        | 0.28    |
| C4                   | 7.9 ± 4.2       | 3.27 (2.75-3.80)         | 0.025*  | 4.24 (3.70-4.78)                        | 0.008*  |
| C5                   | 8.7 ± 3.5       | 2.64 (2.13-3.16)         | 0.06    | 2.63 (2.10-3.16)                        | 0.07    |
| <b>PVR quintiles</b> | <b>PVR (WU)</b> |                          |         |                                         |         |
| R-Q1 (referent)      | 1.5 ± 0.4       | 1.0                      | -       | 1.0                                     | -       |
| R-Q2                 | 2.5 ± 0.3       | 0.58 (-0.39-1.49)        | 0.55    | 0.54 (-0.38-1.45)                       | 0.5     |
| R-Q3                 | 4.0 ± 0.5       | 2.35 (1.67-3.03)         | 0.21    | 2.08 (1.40-2.76)                        | 0.3     |
| R-Q4                 | 6.0 ± 1.0       | 4.27 (3.62-4.91)         | 0.02*   | 3.83 (3.17-4.49)                        | 0.042*  |
| R-Q5                 | 11.5 ± 3.7      | 3.38 (2.72-4.03)         | 0.06    | 3.76 (3.09-4.42)                        | 0.047*  |

747  
 748  
 749 \* denotes significant variables

750 FIGURES  
751

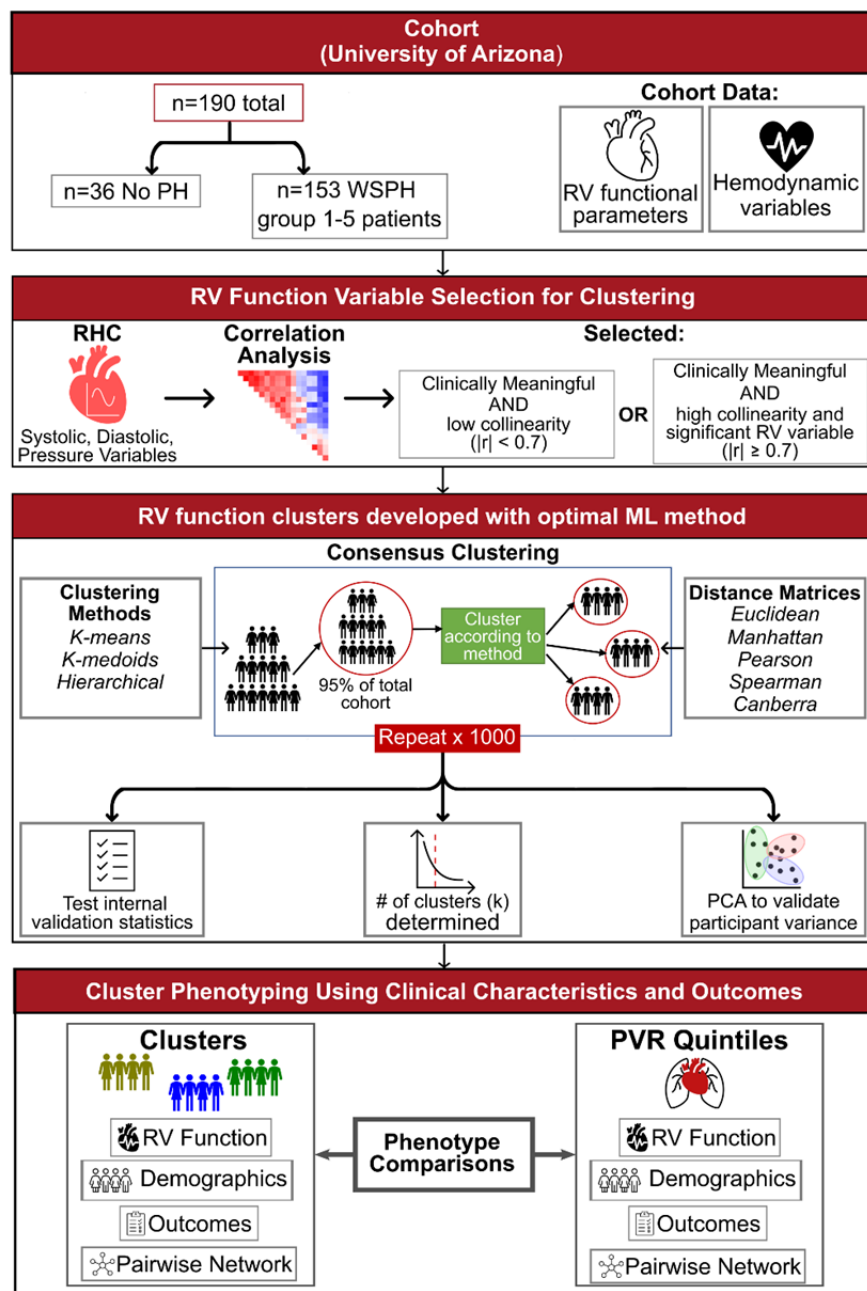

752  
753  
754 **Figure. 1 Overview of the methods used in the development of RV function clusters.**  
755 Participants were identified from the University of Arizona Pulmonary Hypertension Registry  
756 (N=190). The cohort included participants with PH based on World Symposium PH guidelines  
757 (N=153, WSPH) and participants without PH (n = 36, mean PA pressure < 25 mmHg). RV  
758 systolic, diastolic and pressure variables were obtained from right heart catheterization data.  
759 Correlation analysis was used to reduce collinearity ( $|r| > 0.7$ ) and identify variables used in the  
760 clustering analysis. Clinically meaningful variables that were highly correlated with many other  
761 variables ( $|r| \geq 0.7$ ) or only highly correlated with itself ( $|r| < 0.7$ ) were selected for use in  
762 clustering. Multiple unsupervised machine learning clustering methods and distance matrices

763 were examined via consensus clustering algorithm using 95% subset of the cohort and repeated  
764 1000 times. The optimal unsupervised machine learning method and number of clusters (k) was  
765 applied to determine distinct RV function groups based on internal validation statistics, PCA  
766 confirmation of participant variance across clusters. Clinical clustering variables were used to  
767 develop descriptions of RV function within the identified clusters and PVR quintile groups.  
768 Survival analysis was applied to determine cluster and variable associations with outcomes.  
769 RHC, right heart catheterization; PCA, principal component analysis; WSPH, World Symposium  
770 Pulmonary Hypertension groups  
771

772

773  
774

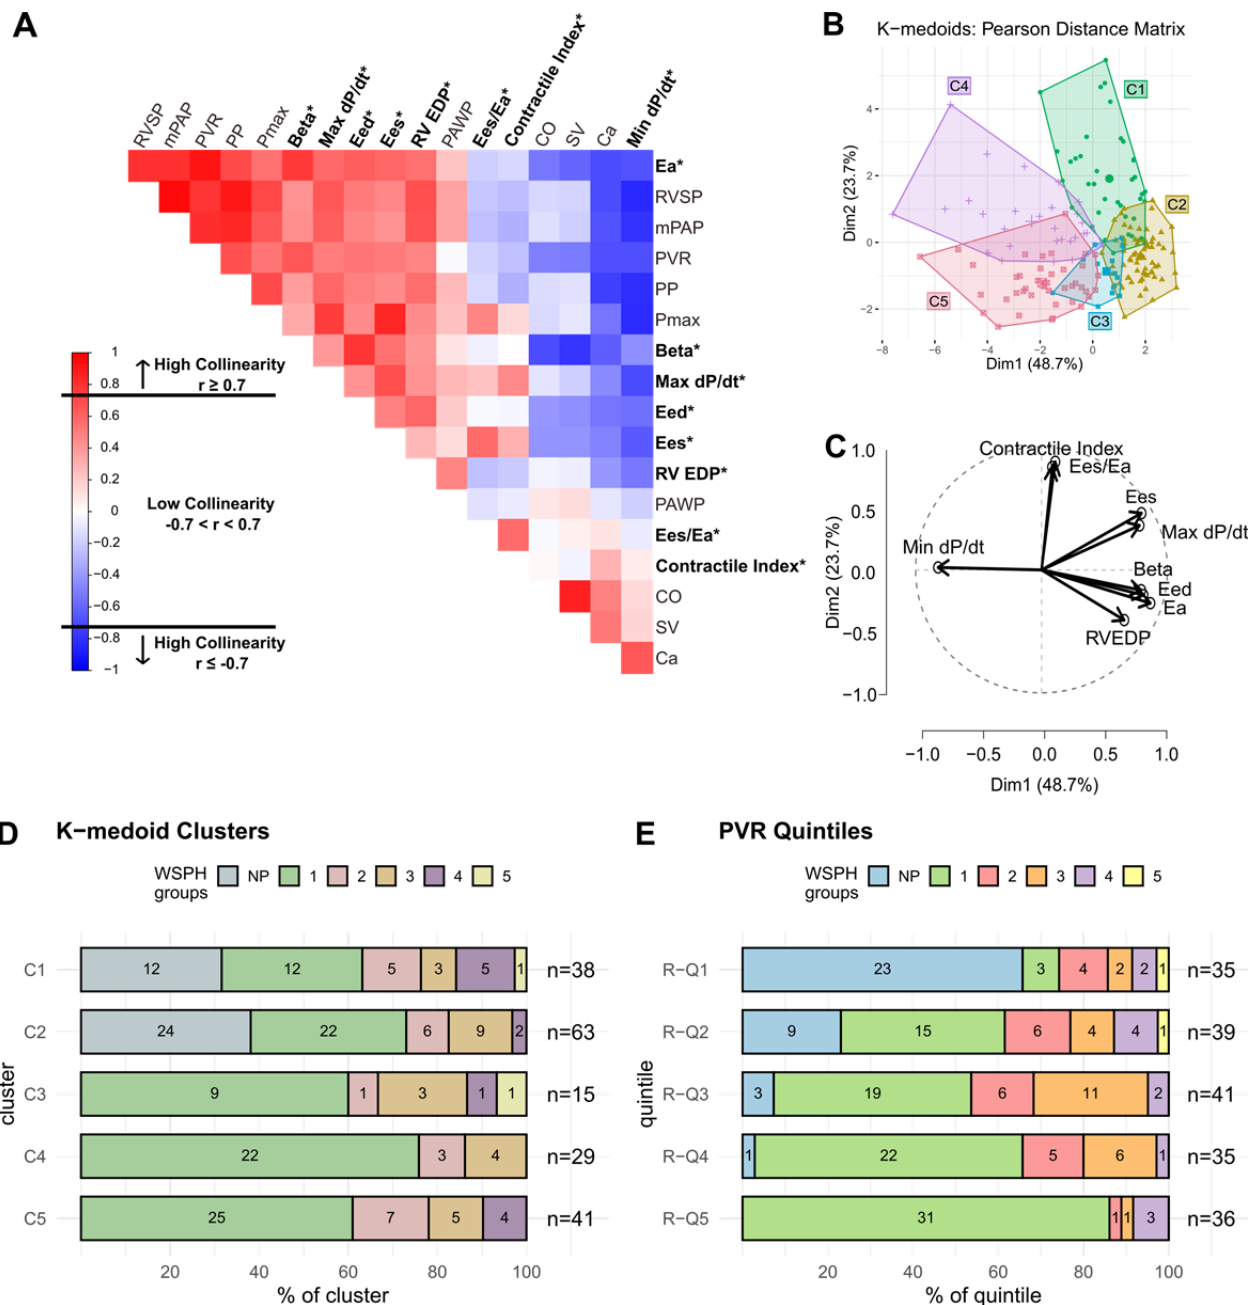

775  
776  
777

**Figure 2: Development of RV clusters using Hemodynamic variables of RV function. A)** Pearson correlation analysis identified variables with low collinearity ( $|r| < 0.7$ ) including: Ees/Ea and the contractile index (red: positive correlations and blue: negative correlations). Variables with high correlations ( $|r| > 0.7$ ) but are clinically meaningful were also considered in the clustering analysis. The chosen variables are designated an \* by their labels. **B)** K-medoid cluster assignment (C1, C2, C3, C4 and C5) projected on the first two principal component analysis plot. The first two principal components (Dim 1 and Dim 2) account for 72.4% of the

785 variance. Clusters are in distinct groups with some overlap between C2, C3, and C5. Each  
786 symbol represents a single participant. Colors and areas represent cluster assignment. **C)** Variable  
787 Correlation plot shows that all variables are contributing to cluster assignments in Dim 1 and 2.  
788 Diastolic function variables and the systolic function variables are grouped respectively. The  
789 majority of Min dP/dt contribution to cluster assignment is in Dim 1 where Contractile index and  
790 Ees/Ea mainly contributed in Dim 2. **(D and E)** World Symposium Pulmonary Hypertension  
791 (WSPH) groups distributed across RV function cluster **(D)** or PVR quintile **(E)**. Each bar shows  
792 number of participants from each WSPH group in each cluster (C1 to C5) and PVR quintile (R-  
793 Q1 to R-Q5). is representative of the percentage of participants in each WSPH group. WSPH  
794 groups are well distributed across both clusters and PVR quintiles, suggesting that WSPH does  
795 not reflect cluster assignment or degree of afterload on the right ventricle. **Abbreviations:** Ea,  
796 arterial elastance; PVR, pulmonary vascular resistance; mPAP, mean pulmonary arterial pressure;  
797 PP, pulse pressure; Pmax, max isovolumetric RV pressure; Ees, end systolic elastance; Eed, end  
798 diastolic elastance; EDP, end diastolic pressure; PCWP, pulmonary capillary wedge pressure;  
799 BDP, beginning diastolic pressure; Ees/Ea, RV-PA coupling ratio; CO, cardiac output; SV, stroke  
800 volume; Ca, pulmonary artery compliance.  
801



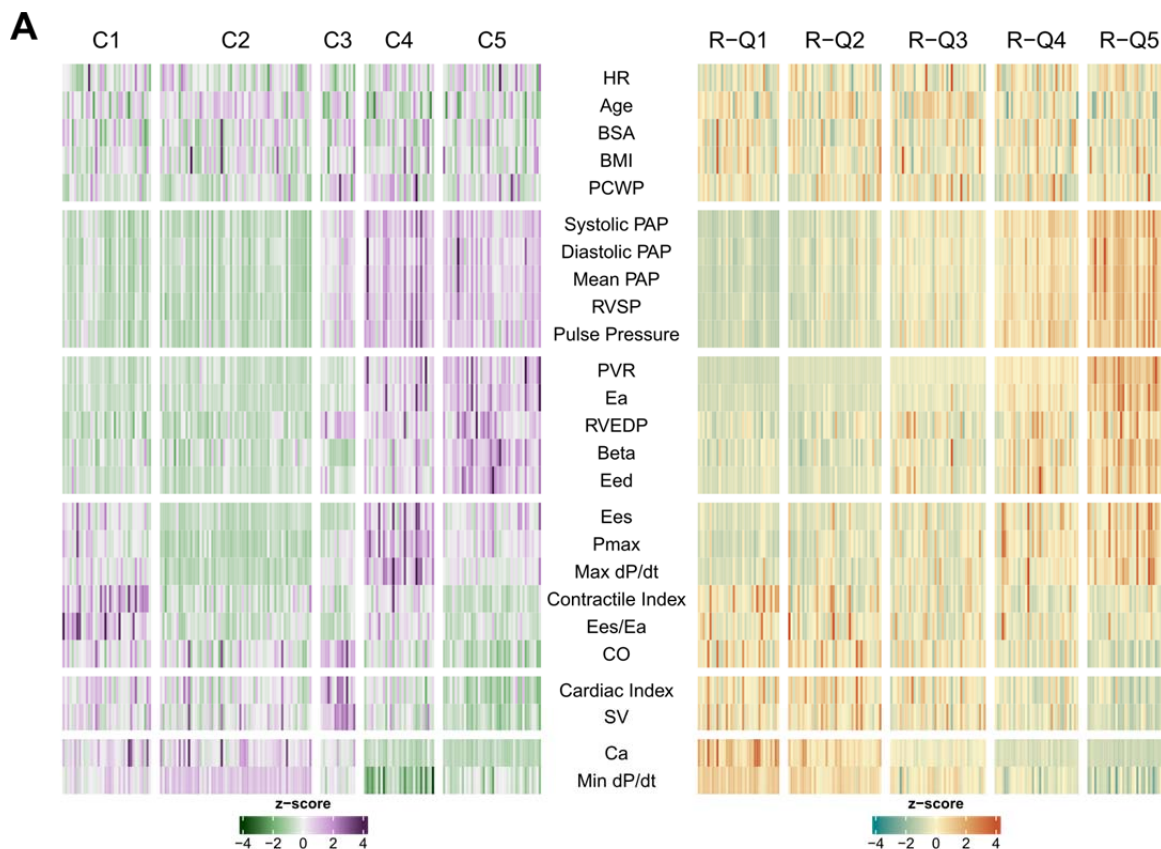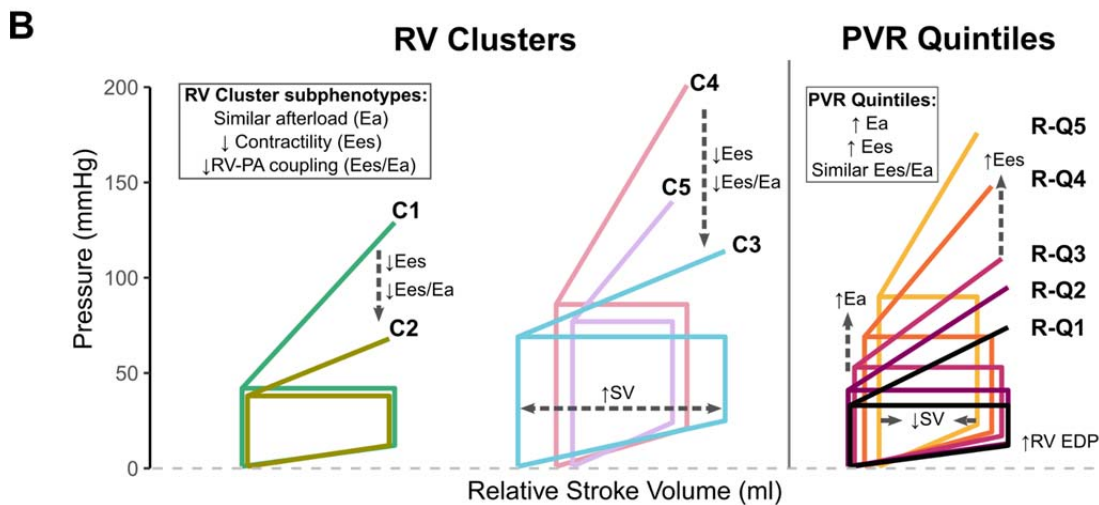

802  
 803 **Figure 3: Representation of RV function profiles determined through clustering and by**  
 804 **pulmonary vascular resistance. (A)** Heatmap of RV function, demographic, and hemodynamic  
 805 variables (rows) in relation to individual participants grouped by k-medoids cluster (C1-C5) or  
 806 PVR quintile (R-Q1 – R-Q5). Z-score represents each value as whether it is greater than or less  
 807 than the overall cohort average. Each cluster is reflective of a distinct functional phenotype. The  
 808 clusters have more nuance in function than the PVR quintiles, which primarily reflects functional  
 809 extremes. C3 uniquely has high CO that is not reflected in the other clusters/quintiles. (B)  
 810 Representative pressure-volume loops for each cluster (left) and PVR quintile (right) based on

811 the mean values for stroke volume, RV end-diastolic pressure, RV systolic pressure and Pmax.  
812 The pressure-volume loops in the RV clusters demonstrate the clusters 2, 5 and 3 have decreased  
813 contractility and RV-PA coupling (Ees/Ea) compared to cluster C1 and C4. Cluster 3 has an  
814 increase in stroke volume compared to all other clusters. Pressure-volume loop analysis for the  
815 PVR quintiles demonstrate that RV contractility (Ees) and RV end-diastolic pressure increase  
816 with increased afterload (Ea). There was a decrease in stroke volume going from R-Q1 to R-Q5.  
817 There were no significant changes in RV-PA coupling (Ees/Ea) in the PVR quintiles.  
818 Abbreviations: BSA, body surface area; BMI, body mass index; RVDP, RV diastolic pressure;  
819 HR, heart rate; RVSP, RV systolic pressure; RVEDP, RV end diastolic pressure; PAP,  
820 pulmonary artery pressure; PVR, pulmonary vascular resistance; Pmax, max isovolumic RV  
821 pressure; Ea, arterial elastance; Eed, end diastolic elastance; Ees, end systolic elastance; Ees/Ea,  
822 RV-PA coupling ratio; PAWP, pulmonary artery wedge pressure; CO, cardiac output; SV, stroke  
823 volume; Ca, PA compliance

824

825

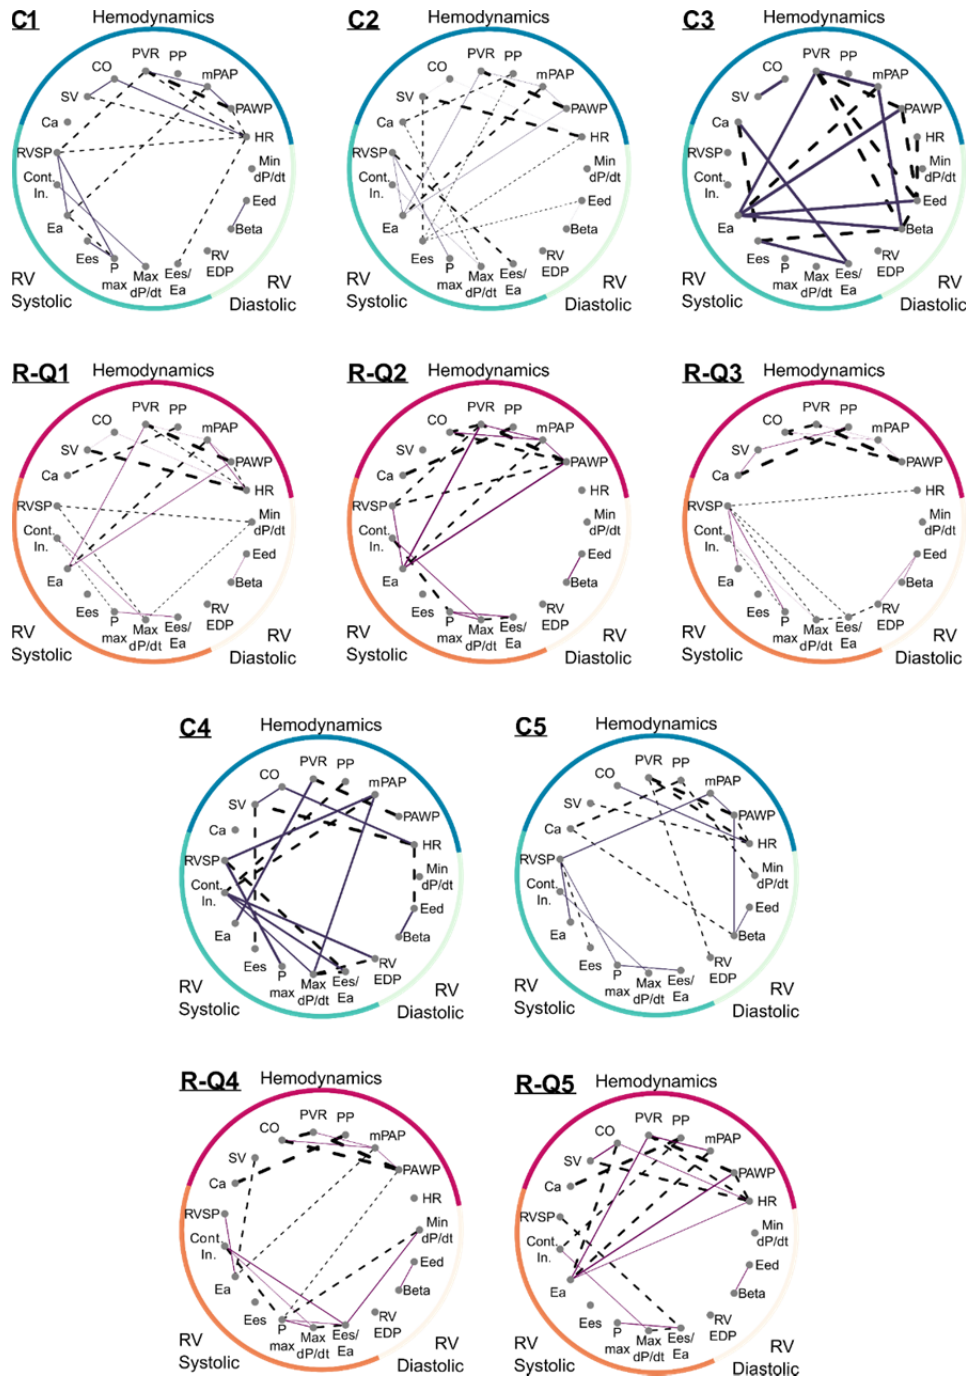

826

827

828 **Figure 4: Network analysis to investigate variable-variable interactions in the Cluster and**  
 829 **PVR quintile groups.** Comparison of variable-variable interactions within the Cluster groups  
 830 (C1 to C5) and PVR quintiles (R-Q1 to R-Q5). Edge pattern reflects whether the partial  
 831 correlation is positive or negative (solid = positive, dashed = negative). Edge weight is  
 832 proportional to the partial correlation values for each variable-variable pair. The interactions  
 833 within Hemodynamics, RV systolic and RV diastolic variables change depending on the Cluster  
 834 and PVR quintile group. In cluster 1 (C1), the variable-variable interactions are primarily within

835 the Hemodynamics or within the RV systolic variables with little cross-talk. Cross-talk between  
836 variable groups increases in cluster 2 (C2) with a further increase in Cluster 3 (C3). The  
837 interactions in cluster 4 (C4) are more similar to cluster 2 where the interaction in cluster 5 (C5)  
838 are more similar to Cluster 1. The variable-variable interaction in the PVR quintiles follow more  
839 of an afterload-dependent change. In the first PVR quintile (R-Q1), the variable-variable  
840 interactions are primarily within the Hemodynamics or within the RV systolic variables. These  
841 interactions intensify in the second PVR quintile (R-Q2). The interaction pattern changes in R-  
842 Q3 with more isolated interactions within hemodynamic and RV systolic variables. The cross-  
843 talk between the RV systolic and RV diastolic variables increases in R-Q4. In R-Q5, the  
844 variable-variable interactions are primarily within the hemodynamics variables with cross talk to  
845 Ea.

846

847

848

849

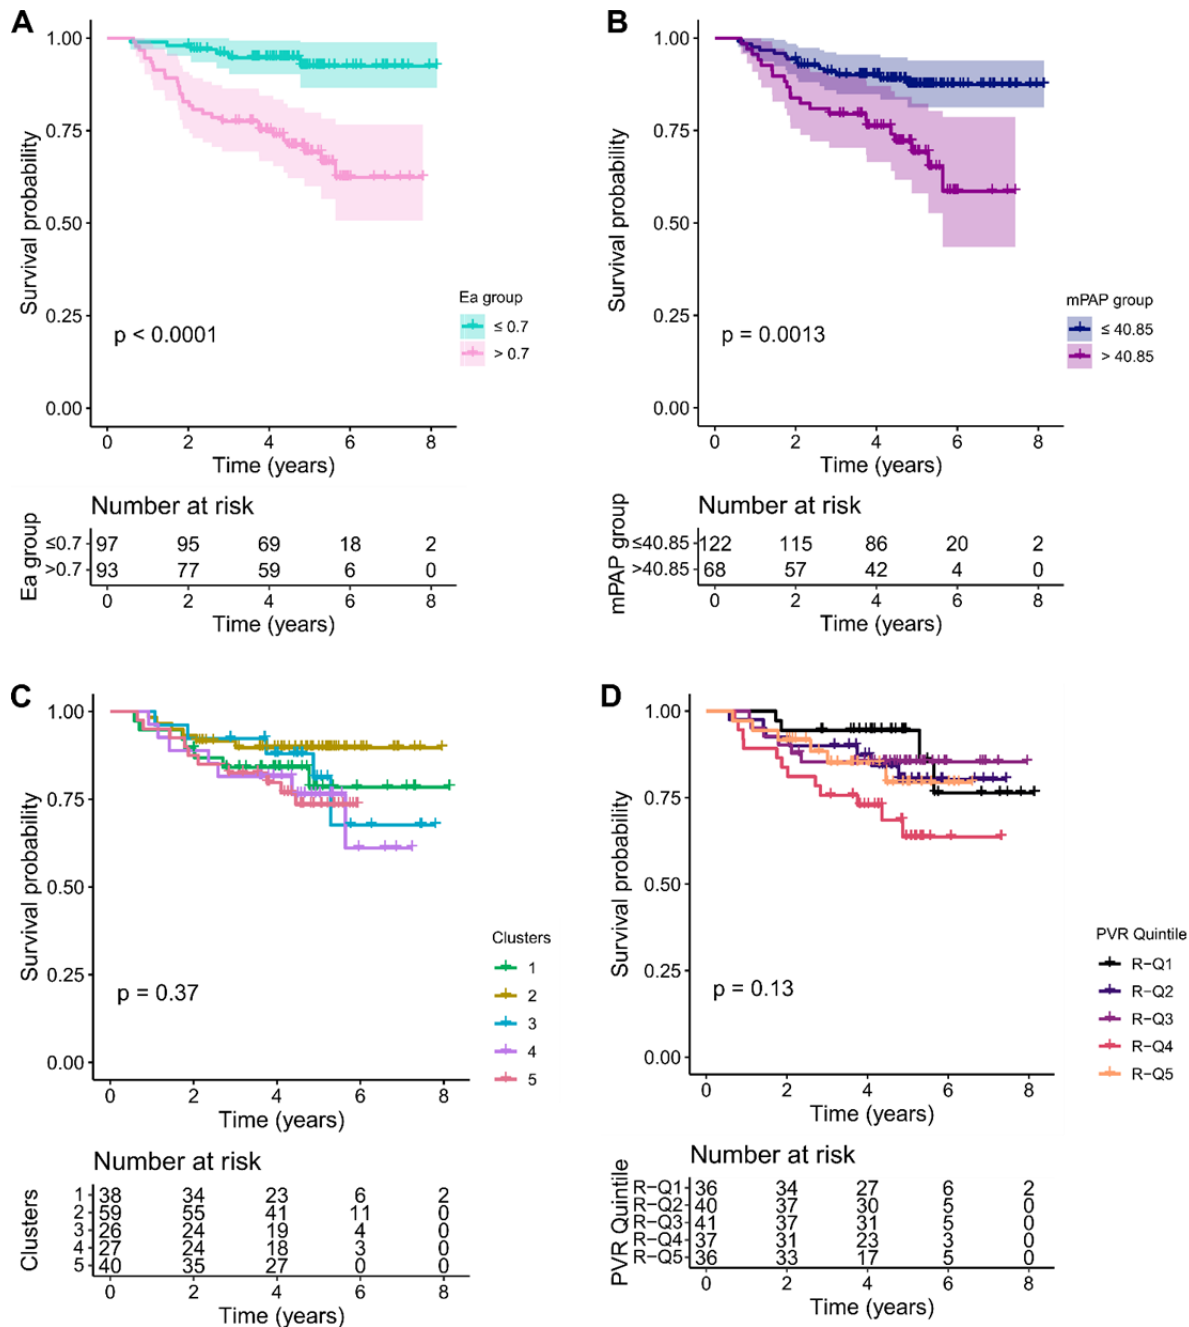

850  
 851 **Figure 5: Association of Clusters and PVR quintiles with mortality.** All-cause mortality  
 852 survival analysis across RV function clusters **(A)** RV function variable Ea was significantly  
 853 associated with survival over time. **(B)** Hemodynamic variable mPAP was significantly  
 854 associated with survival over time. Kaplan Meier curves show no association with survival over  
 855 time to follow-up for k-medoids derived RV function clusters (C1, C3, C4, C5 vs C2) and **(D)**  
 856 PVR quintiles are significantly associated with survival over time (R-Q2, R-Q3, R-Q4, R-Q5 vs  
 857 R-Q1). Log-rank test was used to determine significant differences across groups in Kaplan  
 858 Meier.  
 859
